# Supplementary material
Source: PubMed Central journal article supplement (PMC10712938)
Supplement: NIHMS1936919-supplement-1.pdf [file NIHMS1936919-supplement-1.pdf]

Supplement Appendix

Appendix 1. Supplementary Figures

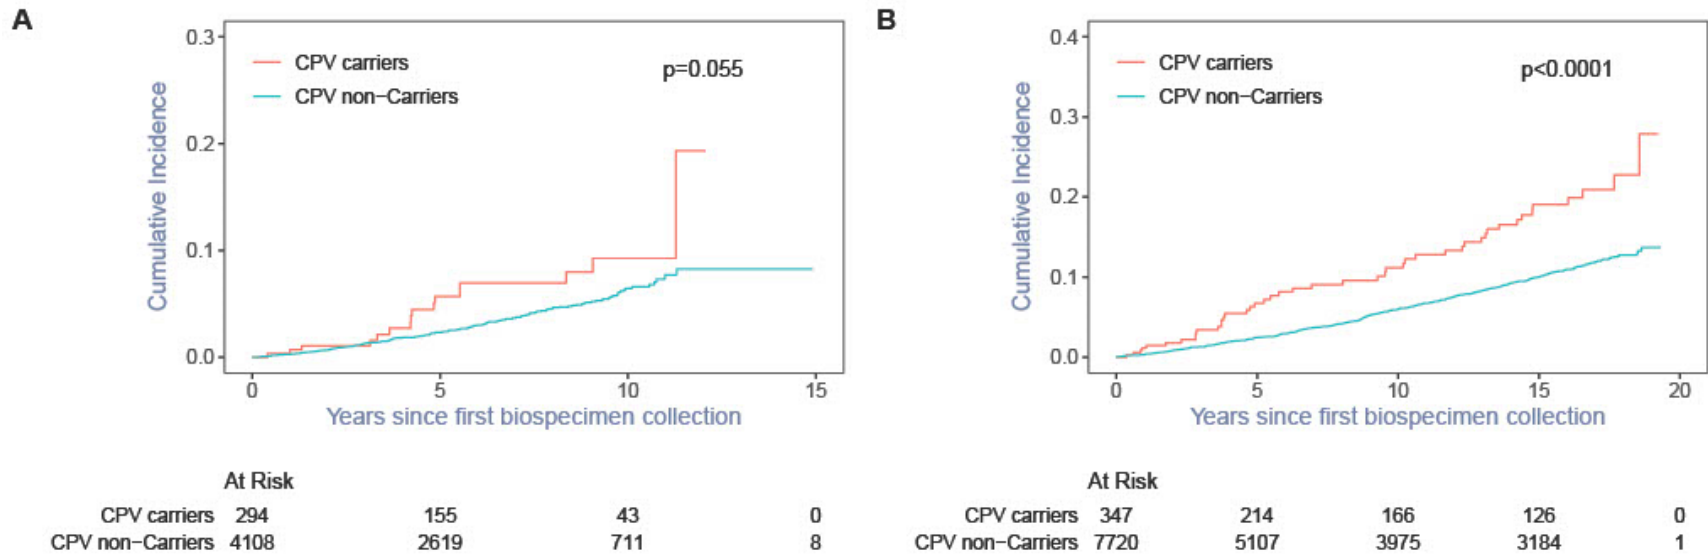

Supplementary Figure 1. Cumulative incidence of all-cause late-mortality among CPV carriers vs. non-carriers in (A) SJLIFE; and (B) CCSS.

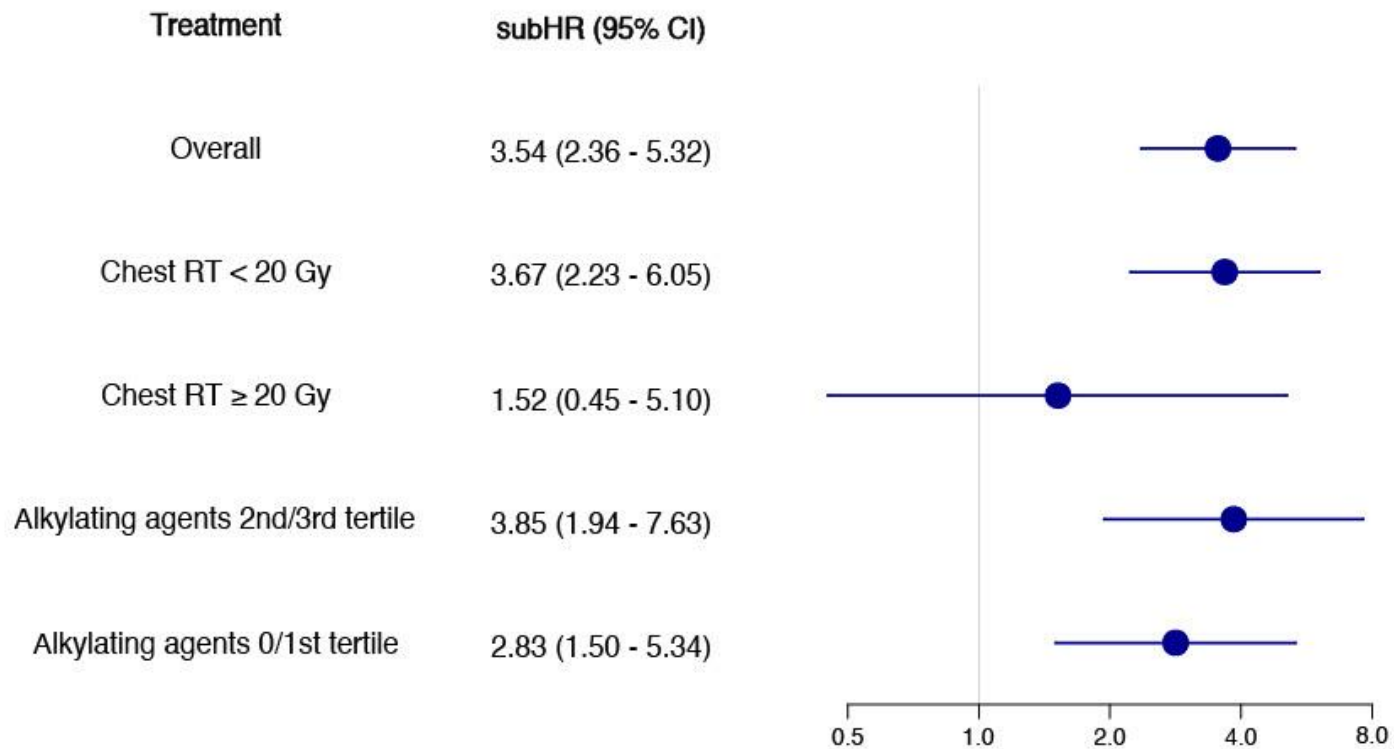

**Supplementary Figure 2. Adjusted associations of CPV status with SMN-related late-mortality by treatment exposures.** Chest-RT<20Gy: 9698 survivors with 124 SMN-related mortality and 218 other-cause mortality; chest-RT≥20Gy: 2123 survivors with 124 SMN-related mortality and 180 other-cause mortality; Alkylating agents 0 or 1<sup>st</sup> tertile: 7646 survivors with 119 SMN-related mortality and 221 other-cause mortality; Alkylating agents 2nd/3rd tertiles: 3935 survivors with 109 SMN-related mortality and 151 other-cause mortality. Abbreviation: subHR, subdistribution hazard ratio.

**Appendix 2. Supplementary Tables**

**Supplementary Table 1. Correlation between body-region specific radiation therapy variables (categorical based on radiation therapy dose).**

| Continuous Variable    | Ordinal Variable | N     | Correlation | Standard Error | Wald Test  |         | Likelihood Ratio Test |         |
|------------------------|------------------|-------|-------------|----------------|------------|---------|-----------------------|---------|
|                        |                  |       |             |                | Chi-Square | P-value | Chi-Square            | P-value |
| Cranial-RT             | Chest-RT         | 11881 | 0.72        | 0.005          | 20380.3829 | <0.0001 | 7172.6616             | <0.0001 |
| Abdomen-RT             | Chest-RT         | 11896 | 0.90        | 0.002          | 164764.261 | <0.0001 | 15015.4163            | <0.0001 |
| Pelvic-RT              | Chest-RT         | 11895 | 0.88        | 0.002          | 131472.527 | <0.0001 | 14189.7287            | <0.0001 |
| Neck-RT                | Chest-RT         | 11898 | 0.91        | 0.002          | 200283.998 | <0.0001 | 14896.3169            | <0.0001 |
| Abdomen- and Pelvic-RT | Chest-RT         | 11898 | 0.88        | 0.003          | 118746.729 | <0.0001 | 13740.7191            | <0.0001 |

**Supplementary Table 2. Population characteristics for survivors in the CCSS original and expansion cohorts.**

| Variable                                                          | Category            | Original cohort, N=5228 (%) |                  |                  | Expansion cohort, N=2839 (%) |                  |                  |
|-------------------------------------------------------------------|---------------------|-----------------------------|------------------|------------------|------------------------------|------------------|------------------|
|                                                                   |                     | Overall                     | CPV carriers     | CPV non-carriers | Overall                      | CPV carriers     | CPV non-carriers |
| <b>Race/Ethnicity</b>                                             | Non-Hispanic White  | 4559 (87.2)                 | 189 (86.7)       | 4370 (87.2)      | 2315 (81.5)                  | 101 (78.3)       | 2214 (81.7)      |
|                                                                   | Non-Hispanic Black  | 108 (2.1)                   | 4 (1.8)          | 104 (2.1)        | 116 (4.1)                    | 8 (6.2)          | 108 (4.0)        |
|                                                                   | Other               | 561 (10.7)                  | 25 (11.5)        | 536 (10.7)       | 408 (14.4)                   | 20 (15.5)        | 388 (14.3)       |
| <b>Sex</b>                                                        | Female              | 2717 (52.0)                 | 118 (54.1)       | 2599 (51.9)      | 1490 (52.5)                  | 66 (51.2)        | 1424 (52.5)      |
|                                                                   | Male                | 2511 (48.0)                 | 100 (45.9)       | 2411 (48.1)      | 1349 (47.5)                  | 63 (48.8)        | 1286 (47.5)      |
| <b>Diagnosis</b>                                                  | ALL                 | 1434 (27.4)                 | 60 (27.5)        | 1374 (27.4)      | 515 (18.1)                   | 9 (7.0)          | 506 (18.7)       |
|                                                                   | CNS                 | 713 (13.6)                  | 41 (18.8)        | 672 (13.4)       | 718 (25.3)                   | 58 (45.0)        | 660 (24.4)       |
|                                                                   | Hodgkin lymphoma    | 695 (13.3)                  | 14 (6.4)         | 681 (13.6)       | 342 (12.0)                   | 8 (6.2)          | 334 (12.3)       |
|                                                                   | Other malignancies* | 2386 (45.6)                 | 103 (47.2)       | 2283 (45.6)      | 1264 (44.5)                  | 54 (41.9)        | 1210 (44.6)      |
| <b>Chest-RT</b>                                                   | None                | 1764 (33.7)                 | 92 (42.2)        | 1672 (33.4)      | 1637 (57.7)                  | 70 (54.3)        | 1567 (57.8)      |
|                                                                   | >0 to <20           | 2068 (39.6)                 | 81 (37.2)        | 1987 (39.7)      | 628 (22.1)                   | 37 (28.7)        | 591 (21.8)       |
|                                                                   | >=20                | 1036 (19.8)                 | 27 (12.4)        | 1009 (20.1)      | 408 (14.4)                   | 14 (10.9)        | 394 (14.5)       |
|                                                                   | Unknown             | 360 (6.9)                   | 18 (8.3)         | 342 (6.8)        | 166 (5.8)                    | 8 (6.2)          | 158 (5.8)        |
| <b>Alkylating agents</b>                                          | No                  | 2548 (48.7)                 | 112 (51.4)       | 2436 (48.6)      | 1232 (43.4)                  | 71 (55.0)        | 1161 (42.8)      |
|                                                                   | Yes                 | 2076 (39.7)                 | 75 (34.4)        | 2001 (39.9)      | 1405 (49.5)                  | 53 (41.1)        | 1352 (49.9)      |
|                                                                   | Unknown             | 604 (11.6)                  | 31 (14.2)        | 573 (11.4)       | 202 (7.1)                    | 5 (3.9)          | 197 (7.3)        |
| <b>Anthracyclines</b>                                             | No                  | 3151 (60.3)                 | 127 (58.3)       | 3024 (60.4)      | 1217 (42.9)                  | 78 (60.5)        | 1139 (42.0)      |
|                                                                   | Yes                 | 1645 (31.5)                 | 70 (32.1)        | 1575 (31.4)      | 1457 (51.3)                  | 45 (34.9)        | 1412 (52.1)      |
|                                                                   | Unknown             | 432 (8.3)                   | 21 (9.6)         | 411 (8.2)        | 165 (5.8)                    | 6 (4.7)          | 159 (5.9)        |
| <b>Epipodophyllotoxins</b>                                        | No                  | 4753 (90.9)                 | 189 (86.7)       | 4564 (91.1)      | 2057 (72.5)                  | 97 (75.2)        | 1960 (72.3)      |
|                                                                   | Yes                 | 174 (3.3)                   | 9 (4.1)          | 165 (3.3)        | 644 (22.7)                   | 29 (22.5)        | 615 (22.7)       |
|                                                                   | Unknown             | 301 (5.8)                   | 20 (9.2)         | 281 (5.6)        | 138 (4.9)                    | 3 (2.3)          | 135 (5.0)        |
| <b>Age at diagnosis</b>                                           | Overall             | 7.2 (3.2-13.6)              | 5.8 (2.8-14.0)   | 7.3 (3.2-13.6)   | 7.7 (3.4-13.5)               | 5.1 (2.1-10.2)   | 7.9 (3.5-13.5)   |
|                                                                   | 0-4                 | 2022 (38.7)                 | 98 (45.0)        | 1924 (38.4)      | 990 (34.9)                   | 64 (49.6)        | 926 (34.2)       |
|                                                                   | 5-9                 | 1169 (22.4)                 | 43 (19.7)        | 1126 (22.5)      | 683 (24.1)                   | 31 (24.0)        | 652 (24.1)       |
|                                                                   | 10-14               | 1077 (20.6)                 | 37 (17.0)        | 1040 (20.8)      | 692 (24.4)                   | 24 (18.6)        | 668 (24.6)       |
|                                                                   | >=15                | 960 (18.4)                  | 40 (18.3)        | 920 (18.4)       | 474 (16.7)                   | 10 (7.8)         | 464 (17.1)       |
| <b>Age at first biospecimen, median (IQR)</b>                     |                     | 30.8 (24.5-37.1)            | 29.9 (22.2-36.8) | 30.8 (24.6-37.1) | 30.2 (25.8-35.1)             | 27.7 (24.0-32.2) | 30.4 (25.9-35.2) |
| <b>Time from diagnosis to the first biospecimen, median (IQR)</b> |                     | 22.3 (17.9-26.8)            | 21.5 (16.9-26.1) | 22.3 (18.0-26.8) | 22.1 (19.0-25.3)             | 22.2 (18.8-24.7) | 22.1 (19.1-25.3) |

| Variable                                                        | Category  | Original cohort, N=5228 (%) |                  |                  | Expansion cohort, N=2839 (%) |                  |                  |
|-----------------------------------------------------------------|-----------|-----------------------------|------------------|------------------|------------------------------|------------------|------------------|
|                                                                 |           | Overall                     | CPV carriers     | CPV non-carriers | Overall                      | CPV carriers     | CPV non-carriers |
| <b>Follow up time since the first biospecimen, median (IQR)</b> | Censoring | 16.3 (14.3-17.6)            | 16.1 (14.2-17.7) | 16.3 (14.3-17.6) | 2.0 (1.2-2.4)                | 2.0 (1.2-2.4)    | 2.0 (1.2-2.4)    |
|                                                                 | Death     | 9.1 (4.9-13.1)              | 8.7 (3.8-13.1)   | 9.1 (5.1-13.1)   | 1.8 (1.0-3.2)                | 1.8 (0.9-3.7)    | 2.1 (1.0-3.1)    |
| <b>Attained age, median (IQR)</b>                               | Censoring | 45.4 (39.6-51.2)            | 43.7 (38.0-49.1) | 45.5 (39.7-51.3) | 32.6 (28.2-37.5)             | 30.2 (26.2-34.6) | 32.7 (28.3-37.6) |
|                                                                 | Death     | 44.4 (37.7-51.3)            | 41.7 (34.7-46.4) | 44.9 (38.0-51.8) | 30.6 (29.0-38.8)             | 30.5 (24.4-43.1) | 30.9 (29.2-38.5) |

Abbreviations: ALL, Acute lymphoblastic leukemia; CNS, Central nervous system; CPV, cancer predisposing variant; RT, radiotherapy; SJLIFE, St. Jude Lifetime Cohort Study; CCSS, Childhood Cancer Survivor Study; IQR, Inter-Quartile Range. \*Other malignancies included acute myeloid leukemia, germ cell tumor, neuroblastoma, non-Hodgkin lymphoma, retinoblastoma, sarcoma, Wilms tumor and other rare types.

**Supplementary Table 3. Populations characteristics for sequenced survivors and not-sequenced survivors in the SJLIFE study.**

| Variable                                    | Category                     | Sequenced,<br>n=4402 (%) | Not-Sequenced,<br>n=961 (%) | P-value<br>(Chi-squared test) |
|---------------------------------------------|------------------------------|--------------------------|-----------------------------|-------------------------------|
| Race                                        | Non-Hispanic White           | 3463 (78.7)              | 669 (69.6)                  | <0.0001                       |
|                                             | Non-Hispanic Black           | 700 (15.9)               | 169 (17.6)                  |                               |
|                                             | Other                        | 237 (5.4)                | 123 (12.8)                  |                               |
| Sex                                         | Female                       | 2090 (47.5)              | 458 (47.7)                  | 0.92                          |
|                                             | Male                         | 2312 (52.5)              | 503 (52.3)                  |                               |
| Diagnosis                                   | Acute lymphoblastic leukemia | 1259 (28.6)              | 252 (26.2)                  | 0.00017                       |
|                                             | Central nervous system (CNS) | 648 (14.7)               | 158 (16.4)                  |                               |
|                                             | Hodgkin lymphoma             | 467 (10.6)               | 63 (6.6)                    |                               |
|                                             | Other malignancies           | 2028 (46.1)              | 488 (50.8)                  |                               |
| Follow-up time from<br>diagnosis, mean (SD) |                              | 27.13 (16.2)             | 19.84 (10.1)                | <0.0001 <sup>#</sup>          |
| SMN                                         | Yes                          | 298 (6.8)                | 89 (9.3)                    | 0.0068                        |
| Late-Mortality                              | SMN-related                  | 44 (1.0)                 | 13 (1.4)                    | 0.089                         |
|                                             | Other-cause                  | 103 (2.3)                | 12 (1.2)                    |                               |
|                                             | Unknown-cause                | 27 (0.6)                 | 4 (0.4)                     |                               |

Abbreviations: SJLIFE, the St. Jude Lifetime Cohort Study; SD, standard deviation; SMN, Subsequent Malignant Neoplasm. <sup>#</sup> t-test

**Supplementary Table 4. Populations characteristics for sequenced survivors and not-sequenced survivors in the CCSS study.**

| Variable                                       | Category                     | Sequenced,<br>n=8067 (%) | Not-Sequenced,<br>n=15791 (%) | P-value<br>Chi-squared test) |
|------------------------------------------------|------------------------------|--------------------------|-------------------------------|------------------------------|
| Race                                           | Missing                      | 0 (0.0)                  | 6 (0.0)                       |                              |
|                                                | Non-Hispanic White           | 6874 (85.2)              | 12149 (76.9)                  | <0.0001                      |
|                                                | Non-Hispanic Black           | 224 (2.8)                | 1280 (8.1)                    |                              |
|                                                | Other                        | 969 (12.0)               | 2356 (14.9)                   |                              |
| Sex                                            | Missing                      | 0 (0.0)                  | 1 (0.0)                       |                              |
|                                                | Female                       | 4207 (52.2)              | 7011 (44.4)                   | <0.0001                      |
|                                                | Male                         | 3860 (47.8)              | 8779 (55.6)                   |                              |
| Diagnosis                                      | Acute lymphoblastic leukemia | 1949 (24.2)              | 4231 (26.8)                   | <0.0001                      |
|                                                | Central nervous system (CNS) | 1431 (17.7)              | 2647 (16.8)                   |                              |
|                                                | Hodgkin lymphoma             | 1037 (12.9)              | 1827 (11.6)                   |                              |
|                                                | Other malignancies           | 3650 (45.2)              | 7086 (44.9)                   |                              |
| Follow-up time<br>from diagnosis,<br>mean (SD) |                              | 32.69 (7.62)             | 29.89 (7.95)                  | <0.0001 <sup>#</sup>         |
| SMN                                            | Yes                          | 864 (10.7)               | 1106 (7.0)                    | <0.0001                      |
| Late-Mortality                                 | SMN-related                  | 219 (2.7)                | 481 (3.0)                     | <.00001                      |
|                                                | Other-cause                  | 323 (4.0)                | 1077 (6.8)                    |                              |
|                                                | Unknown-cause                | 49 (0.6)                 | 125 (0.8)                     |                              |

Abbreviations: CCSS, the Childhood Cancer Survivor Study; SD, standard deviation; SMN, Subsequent Malignant Neoplasm. <sup>#</sup>t-test

**Supplementary Table 5. Pathogenic/likely pathogenic variants in 60 cancer predisposition genes (SJCPG60) in SJLIFE and CCSS cohorts.**

| ID          | Chr   | Pos                   | Chr_Allele              | Alternative_Allele | Gene          | Diagnosis | Cohort | SMN | SMN_Mortality |
|-------------|-------|-----------------------|-------------------------|--------------------|---------------|-----------|--------|-----|---------------|
| SJALL019712 | chr2  | 47799610              | AAAG                    | -                  | <i>MSH6</i>   | ALL       | SJLIFE | No  | No            |
| SJALL003120 | chr17 | 7673780               | T                       | A                  | <i>TP53</i>   | ALL       | SJLIFE | Yes | No            |
| SJALL018429 | chr16 | 23637886              | ACAA                    | -                  | <i>PALB2</i>  | ALL       | SJLIFE | No  | No            |
| SJALL005325 | chr17 | 7674221               | G                       | A                  | <i>TP53</i>   | ALL       | SJLIFE | No  | No            |
| SJALL019066 | chr13 | 32339288              | AAAG                    | -                  | <i>BRCA2</i>  | ALL       | SJLIFE | No  | No            |
| SJALL019044 | chr17 | 7674250               | C                       | T                  | <i>TP53</i>   | ALL       | SJLIFE | No  | No            |
| SJALL018926 | chr17 | 7674217               | C                       | G                  | <i>TP53</i>   | ALL       | SJLIFE | No  | No            |
| SJALL018955 | chr16 | 23621362              | C                       | T                  | <i>PALB2</i>  | ALL       | SJLIFE | No  | No            |
| SJALL041235 | chr5  | 224432                | C                       | T                  | <i>SDHA</i>   | ALL       | SJLIFE | No  | No            |
| SJALL041181 | chr7  | 5997364               | G                       | T                  | <i>PMS2</i>   | ALL       | SJLIFE | No  | No            |
| SJALL041236 | chr17 | 43124028              | CT                      | -                  | <i>BRCA1</i>  | ALL       | SJLIFE | No  | No            |
| SJALL041385 | chr17 | 43070932              | TCTTCTGGGG<br>TCAGGCCAG | -                  | <i>BRCA1</i>  | ALL       | SJLIFE | No  | No            |
| SJALL041423 | chr9  | 37020779              | -                       | A                  | <i>PAX5</i>   | ALL       | SJLIFE | No  | No            |
| SJALL041270 | chr13 | 32339422              | -                       | A                  | <i>BRCA2</i>  | ALL       | SJLIFE | No  | No            |
| SJALL042468 | chr16 | 23621362              | C                       | T                  | <i>PALB2</i>  | ALL       | SJLIFE | No  | No            |
| SJALL005157 | chr17 | 7676153               | -                       | G                  | <i>TP53</i>   | ALL       | SJLIFE | Yes | No            |
| SJALL042490 | chr10 | 87863635              | C                       | T                  | <i>PTEN</i>   | ALL       | SJLIFE | No  | No            |
| SJALL041882 | chr13 | 32339483              | TATG                    | -                  | <i>BRCA2</i>  | ALL       | SJLIFE | No  | No            |
| SJALL041892 | chr10 | 43119576              | G                       | A                  | <i>RET</i>    | ALL       | SJLIFE | No  | No            |
| SJALL042683 | chr9  | 21248101-<br>22074100 |                         |                    | <i>CDKN2A</i> | ALL       | SJLIFE | No  | No            |
| SJALL041429 | chr13 | 32340301              | T                       | -                  | <i>BRCA2</i>  | ALL       | SJLIFE | No  | No            |
| SJALL021915 | chr17 | 43063346              | TTTC                    | -                  | <i>BRCA1</i>  | ALL       | SJLIFE | No  | No            |
| SJAML018550 | chr2  | 47800714              | C                       | T                  | <i>MSH6</i>   | AML       | SJLIFE | No  | No            |
| SJAML019107 | chr2  | 47799224              | G                       | A                  | <i>MSH6</i>   | AML       | SJLIFE | No  | No            |
| SJAML030024 | chr19 | 32305801-<br>33702900 |                         |                    | <i>CEBPA</i>  | AML       | SJLIFE | No  | No            |
| SJCNS017897 | chr2  | 47803473              | C                       | T                  | <i>MSH6</i>   | CNS       | SJLIFE | No  | No            |
| SJCNS018579 | chr17 | 43093074              | G                       | -                  | <i>BRCA1</i>  | CNS       | SJLIFE | Yes | No            |
| SJCNS018569 | chr17 | 31223568              | G                       | A                  | <i>NF1</i>    | CNS       | SJLIFE | No  | No            |



|              |       |           |                                                      |   |               |       |        |     |     |
|--------------|-------|-----------|------------------------------------------------------|---|---------------|-------|--------|-----|-----|
| SJCNS019165  | chr17 | 31259067  | A                                                    | - | <i>NF1</i>    | CNS   | SJLIFE | Yes | No  |
| SJCNS041009  | chr17 | 31265243  | A                                                    | - | <i>NF1</i>    | CNS   | SJLIFE | No  | No  |
| SJCNS041474  | chr12 | 25245328  | C                                                    | G | <i>KRAS</i>   | CNS   | SJLIFE | No  | No  |
| SJCNS041485  | chr16 | 23635788  | AG                                                   | - | <i>PALB2</i>  | CNS   | SJLIFE | No  | No  |
| SJCNS041476  | chr17 | 43091827  | TTTAC                                                | - | <i>BRCA1</i>  | CNS   | SJLIFE | No  | No  |
| SJCNS041957  | chr17 | 31206360  | C                                                    | T | <i>NF1</i>    | CNS   | SJLIFE | No  | No  |
| SJCNS041907  | chr17 | 31219041  | A                                                    | - | <i>NF1</i>    | CNS   | SJLIFE | No  | No  |
| SJCNS043967  | chr14 | 95117714  | A                                                    | - | <i>DICER1</i> | CNS   | SJLIFE | No  | No  |
| SJCNS044168  | chr17 | 31227282  | -                                                    | A | <i>NF1</i>    | CNS   | SJLIFE | No  | No  |
| SJEWS041505  | chr17 | 43094317  | GATTCAGACT<br>CCCCATCATG<br>TGAGTCATCA<br>GAACCTAACA | - | <i>BRCA1</i>  | EWS   | SJLIFE | No  | No  |
| SJGCT019228  | chr16 | 23621427  | A                                                    | - | <i>PALB2</i>  | GCT   | SJLIFE | No  | No  |
| SJHL019788   | chr1  | 17028712  | -                                                    | C | <i>SDHB</i>   | HL    | SJLIFE | Yes | Yes |
| SJHL018653   | chr7  | 5995628   | G                                                    | C | <i>PMS2</i>   | HL    | SJLIFE | No  | No  |
| SJHL018686   | chr13 | 32356607  | C                                                    | T | <i>BRCA2</i>  | HL    | SJLIFE | Yes | No  |
| SJHL018684   | chr13 | 32338322  | A                                                    | T | <i>BRCA2</i>  | HL    | SJLIFE | Yes | No  |
| SJHL042723   | chr7  | 5987504   | G                                                    | A | <i>PMS2</i>   | HL    | SJLIFE | No  | No  |
| SJNBL019418  | chr17 | 7675088   | C                                                    | T | <i>TP53</i>   | NBL   | SJLIFE | No  | No  |
| SJNHL019807  | chr16 | 23635229  | C                                                    | - | <i>PALB2</i>  | NHL   | SJLIFE | No  | No  |
| SJNHL019808  | chr13 | 32337161  | AAAC                                                 | - | <i>BRCA2</i>  | NHL   | SJLIFE | No  | No  |
| SJNHL019465  | chr13 | 32337161  | A                                                    | - | <i>BRCA2</i>  | NHL   | SJLIFE | No  | No  |
| SJNHL019456  | chr13 | 32337458  | G                                                    | T | <i>BRCA2</i>  | NHL   | SJLIFE | No  | No  |
| SJNHL019492  | chr16 | 23621362  | C                                                    | T | <i>PALB2</i>  | NHL   | SJLIFE | No  | No  |
| SJNHL041039  | chr17 | 43091772  | AGAC                                                 | - | <i>BRCA1</i>  | NHL   | SJLIFE | No  | No  |
| SJNHL041626  | chr13 | 32380085  | C                                                    | T | <i>BRCA2</i>  | NHL   | SJLIFE | No  | No  |
| SJNHL041625  | chr17 | 7674230   | C                                                    | T | <i>TP53</i>   | NHL   | SJLIFE | No  | No  |
| SJNHL042068  | chr13 | 32339063  | AG                                                   | - | <i>BRCA2</i>  | NHL   | SJLIFE | No  | No  |
| SJLM019368   | chr5  | 112834985 | G                                                    | A | <i>APC</i>    | Other | SJLIFE | No  | No  |
| SJHIST018643 | chr13 | 32339288  | AAAG                                                 | - | <i>BRCA2</i>  | Other | SJLIFE | No  | No  |
| SJCA041980   | chr17 | 7673802   | C                                                    | T | <i>TP53</i>   | Other | SJLIFE | No  | No  |
| SJNPC042059  | chr2  | 47806282  | G                                                    | A | <i>MSH6</i>   | Other | SJLIFE | No  | No  |

|             |       |                   |      |            |               |       |        |     |    |
|-------------|-------|-------------------|------|------------|---------------|-------|--------|-----|----|
| SJRB018831  | chr13 | 48368551          | _    | A          | <i>RB1</i>    | RB    | SJLIFE | No  | No |
| SJRB019830  | chr13 | 48473359          | G    | A          | <i>RB1</i>    | RB    | SJLIFE | No  | No |
| SJRB019815  | chr13 | 48379594          | C    | T          | <i>RB1</i>    | RB    | SJLIFE | Yes | No |
| SJRB018828  | chr13 | 48381402          | C    | T          | <i>RB1</i>    | RB    | SJLIFE | No  | No |
| SJRB019569  | chr13 | 48349000          | G    | A          | <i>RB1</i>    | RB    | SJLIFE | No  | No |
| SJRB019575  | chr2  | 47800130          | CAGT | -          | <i>MSH6</i>   | RB    | SJLIFE | No  | No |
| SJRB019567  | chr13 | 48367512          | C    | T          | <i>RB1</i>    | RB    | SJLIFE | No  | No |
| SJRB019561  | chr13 | 48360062          | T    | A          | <i>RB1</i>    | RB    | SJLIFE | No  | No |
| SJRB041652  | chr17 | 43106480          | A    | T          | <i>BRCA1</i>  | RB    | SJLIFE | No  | No |
| SJRB043127  | chr13 | 48368549          | C    | T          | <i>RB1</i>    | RB    | SJLIFE | No  | No |
| SJRB043940  | chr17 | 43124028          | CT   | -          | <i>BRCA1</i>  | RB    | SJLIFE | No  | No |
| SJRB044969  | chr13 | 48342714          | G    | A          | <i>RB1</i>    | RB    | SJLIFE | No  | No |
| SJRHB019599 | chr13 | 32357741          | G    | A          | <i>BRCA2</i>  | RMS   | SJLIFE | No  | No |
| SJRHB042119 | chr17 | 7675070           | C    | T          | <i>TP53</i>   | RMS   | SJLIFE | No  | No |
| SJSTS019607 | chr17 | 43094707          | -    | CCACATGGCT | <i>BRCA1</i>  | STS   | SJLIFE | Yes | No |
| SJSTS042132 | chr17 | 43092597          | A    | C          | <i>BRCA1</i>  | STS   | SJLIFE | No  | No |
| SJWLM018891 | chr17 | 7675058           | C    | T          | <i>TP53</i>   | WT    | SJLIFE | No  | No |
| SJWLM041719 | chr13 | 32336284          | G    | -          | <i>BRCA2</i>  | WT    | SJLIFE | No  | No |
| SJWLM043921 | chr11 | 31376101-40055600 |      |            | <i>WT1</i>    | WT    | SJLIFE | No  | No |
| SJWLM019670 | chr2  | 47800714          | C    | T          | <i>MSH6</i>   | WT    | SJLIFE | No  | No |
| SJACT056015 | chr17 | 7674221           | G    | A          | <i>TP53</i>   | Other | SJLIFE | Yes | No |
| SJALL003467 | chr13 | 32340301          | T    | -          | <i>BRCA2</i>  | ALL   | SJLIFE | No  | No |
| SJALL004093 | chr17 | 43092849          | TT   | -          | <i>BRCA1</i>  | ALL   | SJLIFE | No  | No |
| SJALL018309 | chr16 | 23621362          | C    | T          | <i>PALB2</i>  | ALL   | SJLIFE | No  | No |
| SJALL058410 | chr16 | 23635872          | G    | -          | <i>PALB2</i>  | ALL   | SJLIFE | No  | No |
| SJCA056926  | chr17 | 7674893           | C    | T          | <i>TP53</i>   | Other | SJLIFE | No  | No |
| SJCNS056414 | chr2  | 47379007          | C    | T          | <i>EPCAM</i>  | CNS   | SJLIFE | No  | No |
| SJCNS056526 | chr13 | 32357916          | G    | T          | <i>BRCA2</i>  | CNS   | SJLIFE | No  | No |
| SJCNS056849 | chr7  | 5997349           | G    | -          | <i>PMS2</i>   | CNS   | SJLIFE | No  | No |
| SJCNS058358 | chr12 | 112489084         | G    | A          | <i>PTPN11</i> | CNS   | SJLIFE | No  | No |
| SJEPD056229 | chr13 | 32379465          | C    | -          | <i>BRCA2</i>  | CNS   | SJLIFE | No  | No |
| SJMB008012  | chr13 | 32355073          | T    | -          | <i>BRCA2</i>  | CNS   | SJLIFE | No  | No |

|             |       |                       |       |   |               |       |        |     |    |
|-------------|-------|-----------------------|-------|---|---------------|-------|--------|-----|----|
| SJMB008039  | chr13 | 32379795              | T     | A | <i>BRCA2</i>  | CNS   | SJLIFE | No  | No |
| SJMB056244  | chr10 | 102594066             | G     | T | <i>SUFU</i>   | CNS   | SJLIFE | No  | No |
| SJMB056454  | chr2  | 47803501              | C     | - | <i>MSH6</i>   | CNS   | SJLIFE | No  | No |
| SJMB058480  | chr16 | 23637886              | ACAA  | - | <i>PALB2</i>  | CNS   | SJLIFE | Yes | No |
| SJMEL058366 | chr16 | 23621362              | C     | T | <i>PALB2</i>  | Other | SJLIFE | No  | No |
| SJOS001118  | chr16 | 23634896              | T     | - | <i>PALB2</i>  | OS    | SJLIFE | No  | No |
| SJRB056055  | chr13 | 48379651              | G     | A | <i>RB1</i>    | RB    | SJLIFE | No  | No |
| SJRB056218  | chr13 | 48307359              | A     | T | <i>RB1</i>    | RB    | SJLIFE | No  | No |
| SJRB056236  | chr13 | 48379594              | C     | T | <i>RB1</i>    | RB    | SJLIFE | No  | No |
| SJRB056237  | chr13 | 48381283              | TG    | - | <i>RB1</i>    | RB    | SJLIFE | No  | No |
| SJRB056239  | chr13 | 46866401-<br>50495100 |       |   | <i>RB1</i>    | RB    | SJLIFE | No  | No |
| SJRB056361  | chr17 | 43093074              | G     | - | <i>BRCA1</i>  | RB    | SJLIFE | No  | No |
| SJRB056382  | chr13 | 48362818              | C     | - | <i>RB1</i>    | RB    | SJLIFE | No  | No |
| SJRB056418  | chr13 | 48349001              | G     | A | <i>RB1</i>    | RB    | SJLIFE | No  | No |
| SJRB058289  | chr13 | 48465250              | A     | T | <i>RB1</i>    | RB    | SJLIFE | No  | No |
| SJRB058315  | chr13 | 48380191              | AT    | - | <i>RB1</i>    | RB    | SJLIFE | No  | No |
| SJRB058341  | chr13 | 48362865              | CAGAA | - | <i>RB1</i>    | RB    | SJLIFE | No  | No |
| SJRB058443  | chr13 | 48469801-<br>48959200 |       |   | <i>RB1</i>    | RB    | SJLIFE | No  | No |
| SJRB058486  | chr13 | 48373493              | G     | A | <i>RB1</i>    | RB    | SJLIFE | No  | No |
| SJRGB003903 | chr17 | 7675088               | C     | T | <i>TP53</i>   | RMS   | SJLIFE | No  | No |
| SJRGB003939 | chr17 | 7674221               | G     | A | <i>TP53</i>   | RMS   | SJLIFE | Yes | No |
| SJRGB058455 | chr13 | 32362627              | CCTTT | - | <i>BRCA2</i>  | RMS   | SJLIFE | No  | No |
| SJSTS057292 | chr17 | 31235713              | -     | A | <i>NF1</i>    | STS   | SJLIFE | No  | No |
| SJWLM056459 | chr16 | 23629897              | G     | A | <i>PALB2</i>  | WT    | SJLIFE | No  | No |
| SJCNS041962 | chr1  | 161356832             | C     | T | <i>SDHC</i>   | CNS   | SJLIFE | No  | No |
| SJRB018834  | chr13 | 48342617              | A     | - | <i>RB1</i>    | RB    | SJLIFE | No  | No |
| SJRB058452  | chr13 | 48393801-<br>52252700 |       |   | <i>RB1</i>    | RB    | SJLIFE | No  | No |
| SJRB019558  | chr13 | 48364923              | A     | _ | <i>RB1</i>    | RB    | SJLIFE | No  | No |
| SJSTO19551  | chr14 | 95124247              | _     | A | <i>DICER1</i> | Other | SJLIFE | No  | No |
| SJCNS056915 | chr17 | 31235963              | C     | T | <i>NF1</i>    | CNS   | SJLIFE | No  | No |

|             |       |                   |                       |   |                |       |        |     |    |
|-------------|-------|-------------------|-----------------------|---|----------------|-------|--------|-----|----|
| SJRB058313  | chr13 | 46468001-48959200 |                       |   | <i>RB1</i>     | RB    | SJLIFE | No  | No |
| SJRB019573  | chr13 | 48349013          | A                     | - | <i>RB1</i>     | RB    | SJLIFE | No  | No |
| SJLGG011283 | chr17 | 31229954          | AA                    | _ | <i>NF1</i>     | CNS   | SJLIFE | No  | No |
| SJSTS018869 | chr14 | 95104075          | 5bp                   | _ | <i>DICER1</i>  | STS   | SJLIFE | No  | No |
| SJCNS058356 | chr17 | 31225132          | A                     | - | <i>NF1</i>     | CNS   | SJLIFE | No  | No |
| SJCNS042486 | chr9  | 95458146          | C                     | - | <i>PTCH1</i>   | CNS   | SJLIFE | No  | No |
| SJCNS018601 | chr17 | 31235728          | C                     | T | <i>NF1</i>     | CNS   | SJLIFE | Yes | No |
| SJSTS058309 | chr17 | 30779001-32083100 |                       |   | <i>NF1</i>     | STS   | SJLIFE | No  | No |
| SJCNS003254 | chr11 | 112088939         | C                     | T | <i>SDHD</i>    | CNS   | SJLIFE | No  | No |
| SJWLM042770 | chr11 | 32396282          | -                     | T | <i>WT1</i>     | WT    | SJLIFE | No  | No |
| SJEWS058225 | chr3  | 128487922         | C                     | G | <i>GATA2</i>   | EWS   | SJLIFE | No  | No |
| SJRB041658  | chr13 | 48360118          | G                     | T | <i>RB1</i>     | RB    | SJLIFE | No  | No |
| SJRB056320  | chr13 | 48336001-48379400 |                       |   | <i>RB1</i>     | RB    | SJLIFE | No  | No |
| SJCNS056352 | chr17 | 31357338          | -                     | A | <i>NF1</i>     | CNS   | SJLIFE | No  | No |
| SJRB043915  | chr13 | 48020101-48770000 |                       |   | <i>RB1</i>     | RB    | SJLIFE | No  | No |
| SJRB058276  | chr7  | 6005918           | C                     | A | <i>PMS2</i>    | RB    | SJLIFE | No  | No |
| SJRB058276  | chr13 | 48358301-48383000 |                       |   | <i>RB1</i>     | RB    | SJLIFE | No  | No |
| SJCML018604 | chr11 | 119278181         | T                     | C | <i>CBL</i>     | Other | SJLIFE | No  | No |
| SJOS056034  | chr2  | 96254061          | A                     | T | <i>TMEM127</i> | OS    | SJLIFE | No  | No |
| SJWLM017961 | chr10 | 43114598          | G                     | T | <i>RET</i>     | WT    | SJLIFE | No  | No |
| SJRB043947  | chr13 | 48303716          | G                     | T | <i>RB1</i>     | RB    | SJLIFE | No  | No |
| SJRB056240  | chr13 | 48307353          | AG                    | - | <i>RB1</i>     | RB    | SJLIFE | No  | No |
| SJCNS043942 | chr10 | 102630078         | AA                    | - | <i>SUFU</i>    | CNS   | SJLIFE | No  | No |
| SJCNS018566 | chr10 | 102627190         | G                     | - | <i>SUFU</i>    | CNS   | SJLIFE | No  | No |
| SJRB019557  | chr13 | 48459721          | TT                    | - | <i>RB1</i>     | RB    | SJLIFE | No  | No |
| SJCNS056254 | chr16 | 2079555           | A                     | G | <i>TSC2</i>    | CNS   | SJLIFE | No  | No |
| SJWLM058307 | chr11 | 32434961          | GCGGAGCCG<br>GTGGCGGC | - | <i>WT1</i>     | WT    | SJLIFE | No  | No |

|             |       |                   |       |      |               |       |        |     |     |
|-------------|-------|-------------------|-------|------|---------------|-------|--------|-----|-----|
| SJRB056471  | chr13 | 46468001-50495200 |       |      | <i>RB1</i>    | RB    | SJLIFE | No  | No  |
| SJRB056195  | chr13 | 48465369          | G     | A    | <i>RB1</i>    | RB    | SJLIFE | No  | No  |
| SJCNS056508 | chr17 | 31201156          | TAAGG | -    | <i>NF1</i>    | CNS   | SJLIFE | No  | No  |
| SJRB056359  | chr13 | 48379594          | C     | T    | <i>RB1</i>    | RB    | SJLIFE | No  | No  |
| SJEPD056209 | chr2  | 47359101-47373300 |       |      | <i>EPCAM</i>  | CNS   | SJLIFE | No  | No  |
| SJCNS042493 | chr17 | 31343059          | C     | A    | <i>NF1</i>    | CNS   | SJLIFE | No  | No  |
| SJST055956  | chr14 | 95108453          | G     | T    | <i>DICER1</i> | Other | SJLIFE | No  | No  |
| SJRB019555  | chr13 | 48349013          | A     | -    | <i>RB1</i>    | RB    | SJLIFE | Yes | Yes |
| SJCNS056364 | chr17 | 31233157          | C     | T    | <i>NF1</i>    | CNS   | SJLIFE | No  | No  |
| SJNBLO06050 | chr5  | 240459            | C     | T    | <i>SDHA</i>   | NBL   | SJLIFE | No  | No  |
| SJRB005819  | chr9  | 21970952          | -     | C    | <i>CDKN2A</i> | RB    | SJLIFE | No  | No  |
| SJALLO41209 | chr10 | 87863635          | C     | T    | <i>PTEN</i>   | ALL   | SJLIFE | No  | No  |
| SJRB056262  | chr13 | 48342646          | TA    | -    | <i>RB1</i>    | RB    | SJLIFE | No  | No  |
| SJRB005836  | chr13 | 48381414          | C     | T    | <i>RB1</i>    | RB    | SJLIFE | No  | No  |
| SJCNS019153 | chr17 | 31221865          | C     | G    | <i>NF1</i>    | CNS   | SJLIFE | No  | No  |
| SJRB056851  | chr13 | 48381246          | G     | A    | <i>RB1</i>    | RB    | SJLIFE | No  | No  |
| SJBCC040981 | chr9  | 95482901-95503800 |       |      | <i>PTCH1</i>  | Other | SJLIFE | No  | No  |
| SJCNS019760 | chr17 | 31249093          | C     | T    | <i>NF1</i>    | CNS   | SJLIFE | No  | No  |
| SJLM019371  | chr5  | 112834948         | T     | G    | <i>APC</i>    | Other | SJLIFE | No  | No  |
| SJRB056394  | chr13 | 48381335          | C     | A    | <i>RB1</i>    | RB    | SJLIFE | No  | No  |
| SJRB058337  | chr13 | 47962301-48816300 |       |      | <i>RB1</i>    | RB    | SJLIFE | No  | No  |
| SJOS019814  | chr16 | 2060687           | C     | -    | <i>TSC2</i>   | OS    | SJLIFE | No  | No  |
| SJCNS019192 | chr17 | 31258502          | G     | -    | <i>NF1</i>    | CNS   | SJLIFE | No  | No  |
| SJRB043898  | chr13 | 48463836          | G     | T    | <i>RB1</i>    | RB    | SJLIFE | No  | No  |
| SJRB005838  | chr13 | 48465070          | C     | T    | <i>RB1</i>    | RB    | SJLIFE | No  | No  |
| SJRB041674  | chr13 | 48380238          | -     | AGCA | <i>RB1</i>    | RB    | SJLIFE | No  | No  |
| SJEWS042715 | chr9  | 95516640          | C     | -    | <i>PTCH1</i>  | EWS   | SJLIFE | No  | No  |
| SJRB056832  | chr13 | 48307353          | -     | AG   | <i>RB1</i>    | RB    | SJLIFE | No  | No  |
| SJOS019530  | chr1  | 241512001         | G     | C    | <i>FH</i>     | OS    | SJLIFE | Yes | Yes |
| SJRB055985  | chr13 | 48364933          | A     | -    | <i>RB1</i>    | RB    | SJLIFE | No  | No  |

|             |       |                       |       |                              |                |       |        |     |    |
|-------------|-------|-----------------------|-------|------------------------------|----------------|-------|--------|-----|----|
| SJWLM018879 | chr9  | 21974796              | -     | GGCTCCATGCTGCT<br>CCCCGCCGCC | <i>CDKN2A</i>  | WT    | SJLIFE | No  | No |
| SJCNS056392 | chr12 | 112477719             | A     | G                            | <i>PTPN11</i>  | CNS   | SJLIFE | No  | No |
| SJCNS041958 | chr17 | 43068101-<br>43071900 |       |                              | <i>BRCA1</i>   | CNS   | SJLIFE | No  | No |
| SJRB019570  | chr13 | 48381445              | T     | G                            | <i>RB1</i>     | RB    | SJLIFE | No  | No |
| SJCNS056277 | chr17 | 31201156              | TAAGG | -                            | <i>NF1</i>     | CNS   | SJLIFE | No  | No |
| SJRB056527  | chr13 | 48381445              | T     | G                            | <i>RB1</i>     | RB    | SJLIFE | No  | No |
| SJRB056425  | chr13 | 48368549              | C     | T                            | <i>RB1</i>     | RB    | SJLIFE | No  | No |
| SJNBL042062 | chr1  | 17033077              | C     | T                            | <i>SDHB</i>    | NBL   | SJLIFE | No  | No |
| SJRB056399  | chr13 | 48379594              | C     | T                            | <i>RB1</i>     | RB    | SJLIFE | No  | No |
| SJWLM041025 | chr11 | 30883501-<br>42792200 |       |                              | <i>WT1</i>     | WT    | SJLIFE | No  | No |
| SJRB018832  | chr13 | 48342617              | A     | -                            | <i>RB1</i>     | RB    | SJLIFE | No  | No |
| SJCNS019127 | chr10 | 102509250             | G     | A                            | <i>SUFU</i>    | CNS   | SJLIFE | Yes | No |
| SJRB058332  | chr13 | 48349024              | G     | A                            | <i>RB1</i>     | RB    | SJLIFE | No  | No |
| SJWLM056122 | chr11 | 32392032              | G     | A                            | <i>WT1</i>     | WT    | SJLIFE | No  | No |
| SJRB043960  | chr13 | 48465238              | C     | T                            | <i>RB1</i>     | RB    | SJLIFE | No  | No |
| SJRB056202  | chr13 | 48381436              | G     | A                            | <i>RB1</i>     | RB    | SJLIFE | No  | No |
| SJWLM058490 | chr11 | 32392717              | G     | A                            | <i>WT1</i>     | WT    | SJLIFE | No  | No |
| SJNBL018745 | chr19 | 10986326              | C     | T                            | <i>SMARCA4</i> | NBL   | SJLIFE | No  | No |
| SJALL041340 | chr11 | 112093129             | C     | T                            | <i>SDHD</i>    | ALL   | SJLIFE | No  | No |
| SJOS019813  | chr13 | 48303931              | C     | T                            | <i>RB1</i>     | OS    | SJLIFE | No  | No |
| SJWLM017957 | chr16 | 68823524              | TG    | -                            | <i>CDH1</i>    | WT    | SJLIFE | No  | No |
| SJCA042484  | chr5  | 112839211             | G     | -                            | <i>APC</i>     | Other | SJLIFE | No  | No |
| SJCNS056907 | chr17 | 31229308              | T     | -                            | <i>NF1</i>     | CNS   | SJLIFE | No  | No |
| SJCNS043971 | chr17 | 31214586              | G     | C                            | <i>NF1</i>     | Other | SJLIFE | No  | No |
| SJSTS019618 | chr1  | 17044824              | C     | T                            | <i>SDHB</i>    | STS   | SJLIFE | Yes | No |
| SJRB056049  | chr13 | 48362865              | C     | T                            | <i>RB1</i>     | RB    | SJLIFE | No  | No |
| SJRB058448  | chr13 | 47651001-<br>48959100 |       |                              | <i>RB1</i>     | RB    | SJLIFE | No  | No |
| SJRB056257  | chr13 | 48453032              | C     | T                            | <i>RB1</i>     | RB    | SJLIFE | No  | No |
| SJRB019566  | chr13 | 48465336              | G     | -                            | <i>RB1</i>     | RB    | SJLIFE | Yes | No |
| SJRH019584  | chr14 | 95103392              | -     | T                            | <i>DICER1</i>  | RMS   | SJLIFE | No  | No |

|             |       |                       |       |   |               |       |        |     |     |
|-------------|-------|-----------------------|-------|---|---------------|-------|--------|-----|-----|
| SJCNS041928 | chr17 | 31259060              | -     | G | <i>NF1</i>    | CNS   | SJLIFE | No  | No  |
| SJHL019346  | chr1  | 241504123             | G     | A | <i>FH</i>     | HL    | SJLIFE | No  | No  |
| SJRHB056228 | chr17 | 31337881              | G     | T | <i>NF1</i>    | RMS   | SJLIFE | No  | No  |
| SJRB019823  | chr17 | 31227289              | G     | T | <i>NF1</i>    | RB    | SJLIFE | No  | No  |
| SJRB017940  | chr13 | 48381281              | T     | - | <i>RB1</i>    | RB    | SJLIFE | No  | No  |
| SJNHL042082 | chr5  | 223509                | C     | T | <i>SDHA</i>   | NHL   | SJLIFE | No  | No  |
| SJRB056465  | chr13 | 48349024              | G     | T | <i>RB1</i>    | RB    | SJLIFE | No  | No  |
| SJCNS043917 | chr17 | 31223510              | TC    | - | <i>NF1</i>    | CNS   | SJLIFE | No  | No  |
| SJCNS003247 | chr12 | 112477719             | A     | G | <i>PTPN11</i> | CNS   | SJLIFE | No  | No  |
| SJRB056131  | chr13 | 48362958              | G     | A | <i>RB1</i>    | RB    | SJLIFE | No  | No  |
| SJRB058240  | chr13 | 48380086              | T     | A | <i>RB1</i>    | RB    | SJLIFE | No  | No  |
| SJCNS056088 | chr17 | 31230886              | C     | G | <i>NF1</i>    | CNS   | SJLIFE | No  | No  |
| SJALL042537 | chr5  | 223509                | C     | T | <i>SDHA</i>   | ALL   | SJLIFE | No  | No  |
| SJRB056868  | chr13 | 48367529              | T     | A | <i>RB1</i>    | RB    | SJLIFE | No  | No  |
| SJRB056410  | chr13 | 48368527              | T     | - | <i>RB1</i>    | RB    | SJLIFE | No  | No  |
| SJSTS056343 | chr17 | 31227607              | G     | C | <i>NF1</i>    | STS   | SJLIFE | No  | No  |
| SJCNS018580 | chr17 | 31226496              | -     | A | <i>NF1</i>    | CNS   | SJLIFE | No  | No  |
| SJRB058445  | chr13 | 48349024              | G     | A | <i>RB1</i>    | RB    | SJLIFE | No  | No  |
| SJRB019828  | chr13 | 48368581              | A     | - | <i>RB1</i>    | RB    | SJLIFE | No  | No  |
| SJRB056050  | chr13 | 48362865              | CAGAA | - | <i>RB1</i>    | RB    | SJLIFE | No  | No  |
| SJCNS018587 | chr17 | 31169999              | T     | G | <i>NF1</i>    | CNS   | SJLIFE | No  | No  |
| SJNBL019380 | chr1  | 241512001             | G     | C | <i>FH</i>     | NBL   | SJLIFE | No  | No  |
| SJCNS041945 | chr17 | 31201471              | C     | T | <i>NF1</i>    | CNS   | SJLIFE | No  | No  |
| SJCNS042482 | chr17 | 31352280              | G     | A | <i>NF1</i>    | CNS   | SJLIFE | No  | No  |
| SJRB017936  | chr13 | 48381402              | C     | T | <i>RB1</i>    | RB    | SJLIFE | Yes | No  |
| SJST056304  | chr14 | 95116600              | A     | - | <i>DICER1</i> | Other | SJLIFE | No  | No  |
| SJRB058297  | chr13 | 48345095              | TAAC  | - | <i>RB1</i>    | RB    | SJLIFE | No  | No  |
| SJRB040971  | chr13 | 48345090              | T     | - | <i>RB1</i>    | RB    | SJLIFE | No  | No  |
| SJCNS043959 | chr10 | 102550088             | C     | T | <i>SUFU</i>   | CNS   | SJLIFE | No  | No  |
| SJWLM018894 | chr11 | 32428554              | G     | A | <i>WT1</i>    | WT    | SJLIFE | No  | Yes |
| SJRB056227  | chr13 | 48381414              | C     | T | <i>RB1</i>    | RB    | SJLIFE | No  | No  |
| SJRB056335  | chr13 | 48343001-<br>48487900 |       |   | <i>RB1</i>    | RB    | SJLIFE | No  | No  |

|             |       |                       |   |    |                |       |        |     |     |
|-------------|-------|-----------------------|---|----|----------------|-------|--------|-----|-----|
| SJALL018964 | chr2  | 96254061              | A | T  | <i>TMEM127</i> | ALL   | SJLIFE | Yes | Yes |
| SJRB058229  | chr13 | 48379624              | C | T  | <i>RB1</i>     | RB    | SJLIFE | No  | No  |
| SJALL021978 | chr9  | 21971200              | C | G  | <i>CDKN2A</i>  | ALL   | SJLIFE | No  | No  |
| SJWLM019664 | chr11 | 32396401              | G | A  | <i>WT1</i>     | WT    | SJLIFE | No  | No  |
| SJRB054     | chr13 | 48238101-<br>48958800 |   |    | <i>RB1</i>     | RB    | SJLIFE | No  | No  |
| SJRB019560  | chr13 | 48368549              | C | T  | <i>RB1</i>     | RB    | SJLIFE | No  | No  |
| SJRB056828  | chr13 | 48381245              | A | T  | <i>RB1</i>     | RB    | SJLIFE | No  | No  |
| SJWLM058260 | chr11 | 32392032              | G | A  | <i>WT1</i>     | WT    | SJLIFE | No  | No  |
| SJRB017939  | chr13 | 48368549              | C | T  | <i>RB1</i>     | RB    | SJLIFE | No  | No  |
| SJGCT056017 | chr10 | 87957951              | C | T  | <i>PTEN</i>    | GCT   | SJLIFE | No  | No  |
| SJRB056440  | chr13 | 48367512              | C | T  | <i>RB1</i>     | RB    | SJLIFE | No  | No  |
| SJCNS058433 | chr22 | 23801082              | G | A  | <i>SMARCB1</i> | CNS   | SJLIFE | No  | No  |
| SJRB017937  | chr13 | 48276601-<br>48342700 |   |    | <i>RB1</i>     | RB    | SJLIFE | Yes | No  |
| SJRB056380  | chr13 | 48465023              | A | -  | <i>RB1</i>     | RB    | SJLIFE | No  | No  |
| SJRB056344  | chr13 | 48368549              | C | T  | <i>RB1</i>     | RB    | SJLIFE | No  | No  |
| SJRB043968  | chr13 | 48459770              | G | A  | <i>RB1</i>     | RB    | SJLIFE | No  | No  |
| SJALL005426 | chr3  | 10149885              | C | G  | <i>VHL</i>     | ALL   | SJLIFE | No  | No  |
| SJRB056103  | chr13 | 48360100              | C | -  | <i>RB1</i>     | RB    | SJLIFE | No  | No  |
| SJRB041669  | chr13 | 48377035              | G | A  | <i>RB1</i>     | RB    | SJLIFE | No  | No  |
| SJALL021892 | chr9  | 37002705              | C | T  | <i>PAX5</i>    | ALL   | SJLIFE | No  | No  |
| SJCNS019135 | chr17 | 31229155              | T | C  | <i>NF1</i>     | CNS   | SJLIFE | No  | No  |
| SJST056405  | chr14 | 95105785              | T | C  | <i>DICER1</i>  | Other | SJLIFE | No  | No  |
| SJALL041234 | chr15 | 66435145              | G | A  | <i>MAP2K1</i>  | ALL   | SJLIFE | No  | No  |
| SJCNS019166 | chr17 | 31334864              | G | T  | <i>NF1</i>     | CNS   | SJLIFE | No  | No  |
| SJCNS058363 | chr17 | 31235649              | T | -  | <i>NF1</i>     | CNS   | SJLIFE | No  | No  |
| SJRB017945  | chr11 | 112088939             | C | T  | <i>SDHD</i>    | RMS   | SJLIFE | No  | No  |
| SJRB056128  | chr13 | 48349024              | G | T  | <i>RB1</i>     | RB    | SJLIFE | No  | No  |
| SJCNS019185 | chr9  | 95485697              | - | TA | <i>PTCH1</i>   | CNS   | SJLIFE | No  | No  |
| SJLGG056893 | chr17 | 31249116              | C | A  | <i>NF1</i>     | CNS   | SJLIFE | No  | No  |
| SJRB056449  | chr13 | 48380065              | - | T  | <i>RB1</i>     | RB    | SJLIFE | No  | No  |
| SJRB041663  | chr13 | 48393801-<br>50495200 |   |    | <i>RB1</i>     | RB    | SJLIFE | Yes | No  |



|             |       |                       |     |    |                |       |        |     |     |
|-------------|-------|-----------------------|-----|----|----------------|-------|--------|-----|-----|
| SJRB042853  | chr13 | 48303991              | -   | C  | <i>RB1</i>     | RB    | SJLIFE | No  | No  |
| SJRB019819  | chr13 | 48368549              | C   | T  | <i>RB1</i>     | RB    | SJLIFE | Yes | Yes |
| SJRB056913  | chr13 | 48373493              | G   | A  | <i>RB1</i>     | RB    | SJLIFE | No  | No  |
| SJHL018683  | chr9  | 95485875              | C   | T  | <i>PTCH1</i>   | HL    | SJLIFE | Yes | No  |
| SJRB058231  | chr13 | 48360019              | G   | T  | <i>RB1</i>     | RB    | SJLIFE | No  | No  |
| SJRGB041684 | chr17 | 31235961              | T   | A  | <i>NF1</i>     | RMS   | SJLIFE | No  | No  |
| SJPGLO42495 | chr11 | 112088939             | C   | T  | <i>SDHD</i>    | Other | SJLIFE | No  | No  |
| SJGCT041520 | chr10 | 87958013              | -   | A  | <i>PTEN</i>    | GCT   | SJLIFE | No  | No  |
| SJCNS052441 | chr17 | 31229098              | T   | A  | <i>NF1</i>     | CNS   | SJLIFE | No  | No  |
| SJRB058288  | chr13 | 46468601-<br>49563700 |     |    | <i>RB1</i>     | RB    | SJLIFE | No  | No  |
| SJRB056474  | chr13 | 48381402              | C   | T  | <i>RB1</i>     | RB    | SJLIFE | No  | No  |
| SJRB058467  | chr13 | 48362859              | C   | T  | <i>RB1</i>     | RB    | SJLIFE | No  | No  |
| SJALLO41391 | chr7  | 6005918               | C   | A  | <i>PMS2</i>    | ALL   | SJLIFE | No  | No  |
| SJRB041651  | chr13 | 48456349              | G   | T  | <i>RB1</i>     | RB    | SJLIFE | No  | No  |
| SJRB041653  | chr13 | 48377035              | G   | A  | <i>RB1</i>     | RB    | SJLIFE | No  | No  |
| SJRB005805  | chr13 | 48381246              | G   | A  | <i>RB1</i>     | RB    | SJLIFE | No  | No  |
| SJRB041662  | chr13 | 48367512              | C   | T  | <i>RB1</i>     | RB    | SJLIFE | Yes | No  |
| SJCNS058306 | chr3  | 10142167              | G   | C  | <i>VHL</i>     | CNS   | SJLIFE | No  | No  |
| SJHL042047  | chr5  | 112842303             | C   | T  | <i>APC</i>     | HL    | SJLIFE | No  | No  |
| SJRB019574  | chr13 | 48459708              | C   | T  | <i>RB1</i>     | RB    | SJLIFE | No  | No  |
| SJRB056389  | chr13 | 48349024              | G   | A  | <i>RB1</i>     | RB    | SJLIFE | No  | No  |
| SJALLO41326 | chr2  | 96265262              | 4bp | -  | <i>TMEM127</i> | ALL   | SJLIFE | No  | No  |
| SJRB018826  | chr13 | 48465249              | C   | G  | <i>RB1</i>     | RB    | SJLIFE | Yes | No  |
| SJRB019565  | chr13 | 48367512              | C   | T  | <i>RB1</i>     | RB    | SJLIFE | No  | No  |
| SJRB019816  | chr13 | 48342714              | G   | C  | <i>RB1</i>     | RB    | SJLIFE | No  | No  |
| SRR14545496 | chr12 | 112477719             | A   | G  | <i>PTPN11</i>  | CNS   | CCSS   | No  | No  |
| SRR14542625 | chr13 | 32379800              | G   | A  | <i>BRCA2</i>   | WT    | CCSS   | No  | No  |
| SRR14544138 | chr17 | 43057122              | A   | G  | <i>BRCA1</i>   | ALL   | CCSS   | No  | No  |
| SRR14544109 | chr17 | 43063930              | C   | T  | <i>BRCA1</i>   | CNS   | CCSS   | No  | No  |
| SRR14545297 | chr5  | 112780865             | C   | T  | <i>APC</i>     | ALL   | CCSS   | No  | No  |
| SRR14542403 | chr13 | 32394688              | G   | C  | <i>BRCA2</i>   | WT    | CCSS   | No  | No  |
| SRR14540645 | chr11 | 64804620              | C   | CG | <i>MEN1</i>    | NBL   | CCSS   | No  | No  |

|             |       |           |       |              |              |     |      |     |     |
|-------------|-------|-----------|-------|--------------|--------------|-----|------|-----|-----|
| SRR14541207 | chr11 | 64804620  | C     | CG           | <i>MEN1</i>  | HL  | CCSS | No  | No  |
| SRR14542827 | chr11 | 64804620  | C     | CG           | <i>MEN1</i>  | EWS | CCSS | No  | No  |
| SRR14543684 | chr11 | 64804620  | C     | CG           | <i>MEN1</i>  | AML | CCSS | No  | No  |
| SRR14543842 | chr11 | 64804620  | C     | CG           | <i>MEN1</i>  | ALL | CCSS | No  | No  |
| SRR14544071 | chr11 | 64804620  | C     | CG           | <i>MEN1</i>  | STS | CCSS | No  | No  |
| SRR14541242 | chr10 | 102504216 | G     | GC           | <i>SUFU</i>  | AML | CCSS | No  | No  |
| SRR14542395 | chr10 | 102504216 | G     | GC           | <i>SUFU</i>  | HL  | CCSS | No  | No  |
| SRR14542630 | chr10 | 102504216 | G     | GC           | <i>SUFU</i>  | ALL | CCSS | No  | No  |
| SRR14543741 | chr10 | 102504216 | G     | GC           | <i>SUFU</i>  | ALL | CCSS | No  | No  |
| SRR14543842 | chr10 | 102504216 | G     | GC           | <i>SUFU</i>  | ALL | CCSS | No  | No  |
| SRR14544438 | chr10 | 102504216 | G     | GC           | <i>SUFU</i>  | CNS | CCSS | No  | No  |
| SRR14543067 | chr17 | 7673717   | T     | TG           | <i>TP53</i>  | ALL | CCSS | No  | No  |
| SRR14544185 | chr17 | 7673739   | TC    | T            | <i>TP53</i>  | OS  | CCSS | Yes | No  |
| SRR14542066 | chr17 | 31159090  | TG    | T            | <i>NF1</i>   | CNS | CCSS | No  | No  |
| SRR14540703 | chr17 | 31163362  | T     | TA           | <i>NF1</i>   | CNS | CCSS | Yes | No  |
| SRR14542000 | chr17 | 31223501  | CA    | C            | <i>NF1</i>   | CNS | CCSS | No  | No  |
| SRR14545393 | chr17 | 31226437  | T     | TAGTGCAGC    | <i>NF1</i>   | NBL | CCSS | No  | No  |
| SRR14541465 | chr17 | 31226459  | A     | AC           | <i>NF1</i>   | CNS | CCSS | No  | No  |
| SRR14543776 | chr17 | 31226459  | A     | AC           | <i>NF1</i>   | ALL | CCSS | No  | No  |
| SRR14542853 | chr17 | 31227581  | CA    | C            | <i>NF1</i>   | CNS | CCSS | No  | No  |
| SRR14540394 | chr17 | 31229953  | CAAT  | C            | <i>NF1</i>   | ALL | CCSS | No  | No  |
| SRR14543357 | chr17 | 31232840  | TACTC | T            | <i>NF1</i>   | CNS | CCSS | No  | No  |
| SRR14541465 | chr17 | 31249025  | T     | TCC          | <i>NF1</i>   | CNS | CCSS | No  | No  |
| SRR14542337 | chr17 | 31252977  | GA    | G            | <i>NF1</i>   | ALL | CCSS | No  | No  |
| SRR14543741 | chr17 | 31326056  | AG    | A            | <i>NF1</i>   | ALL | CCSS | No  | No  |
| SRR14543845 | chr17 | 31326174  | CT    | C            | <i>NF1</i>   | STS | CCSS | No  | No  |
| SRR14544845 | chr17 | 31327530  | CAG   | C            | <i>NF1</i>   | CNS | CCSS | No  | No  |
| SRR14543825 | chr17 | 31334930  | CAA   | C            | <i>NF1</i>   | CNS | CCSS | Yes | Yes |
| SRR14545390 | chr17 | 31336698  | CA    | C            | <i>NF1</i>   | CNS | CCSS | No  | No  |
| SRR14540582 | chr17 | 31337864  | A     | ACAGAACTAGCT | <i>NF1</i>   | STS | CCSS | No  | No  |
| SRR14543811 | chr17 | 31340616  | TTAGA | T            | <i>NF1</i>   | CNS | CCSS | Yes | Yes |
| SRR14545353 | chr17 | 31356539  | A     | AC           | <i>NF1</i>   | STS | CCSS | Yes | Yes |
| SRR14542116 | chr17 | 43057062  | T     | TG           | <i>BRCA1</i> | ALL | CCSS | No  | No  |

|             |       |           |                        |                                                                  |  |                |     |      |     |    |
|-------------|-------|-----------|------------------------|------------------------------------------------------------------|--|----------------|-----|------|-----|----|
| SRR14542822 | chr17 | 43063374  | CT                     | C                                                                |  | <i>BRCA1</i>   | NBL | CCSS | No  | No |
| SRR14543606 | chr17 | 43093520  | CT                     | C                                                                |  | <i>BRCA1</i>   | ALL | CCSS | No  | No |
| SRR14545307 | chr17 | 43094514  | C                      | CT                                                               |  | <i>BRCA1</i>   | EWS | CCSS | No  | No |
| SRR14544189 | chr17 | 43104233  | C                      | CT                                                               |  | <i>BRCA1</i>   | WT  | CCSS | No  | No |
| SRR14545442 | chr17 | 43104233  | C                      | CT                                                               |  | <i>BRCA1</i>   | AML | CCSS | No  | No |
| SRR14541362 | chr17 | 43124027  | ACT                    | A                                                                |  | <i>BRCA1</i>   | ALL | CCSS | No  | No |
| SRR14543162 | chr17 | 43124027  | ACT                    | A                                                                |  | <i>BRCA1</i>   | EWS | CCSS | No  | No |
| SRR14543361 | chr17 | 43124027  | ACT                    | A                                                                |  | <i>BRCA1</i>   | ALL | CCSS | No  | No |
| SRR14543569 | chr17 | 43124027  | ACT                    | A                                                                |  | <i>BRCA1</i>   | HL  | CCSS | No  | No |
| SRR14544647 | chr17 | 43124027  | ACT                    | A                                                                |  | <i>BRCA1</i>   | WT  | CCSS | No  | No |
| SRR14541044 | chr1  | 17044848  | C                      | CGG                                                              |  | <i>SDHB</i>    | CNS | CCSS | No  | No |
| SRR14541229 | chr1  | 17053978  | C                      | CGGCAACCGGCGC<br>CTCAAGGAGAG                                     |  | <i>SDHB</i>    | NBL | CCSS | No  | No |
| SRR14540476 | chr10 | 102597290 | A                      | AGGATGACGAGG                                                     |  | <i>SUFU</i>    | ALL | CCSS | No  | No |
| SRR14544310 | chr10 | 102627189 | AG                     | A                                                                |  | <i>SUFU</i>    | CNS | CCSS | No  | No |
| SRR14543606 | chr10 | 86923468  | T                      | TAAGTAAAATAAGC<br>CAGGCACAGAAAG<br>ACAAACTTCACATG<br>TTCTCACTTAC |  | <i>BMPRI1A</i> | ALL | CCSS | No  | No |
| SRR14544165 | chr10 | 87965303  | C                      | CA                                                               |  | <i>PTEN</i>    | CNS | CCSS | No  | No |
| SRR14540557 | chr11 | 32396268  | CTGCTG                 | C                                                                |  | <i>WT1</i>     | WT  | CCSS | No  | No |
| SRR14540543 | chr11 | 32417575  | AC                     | A                                                                |  | <i>WT1</i>     | WT  | CCSS | No  | No |
| SRR14542651 | chr11 | 32417632  | ATGTCATTTG<br>GTATAAAT | A                                                                |  | <i>WT1</i>     | WT  | CCSS | No  | No |
| SRR14545110 | chr12 | 112473001 | G                      | GA                                                               |  | <i>PTPN11</i>  | NHL | CCSS | No  | No |
| SRR14540552 | chr13 | 32332974  | AG                     | A                                                                |  | <i>BRCA2</i>   | STS | CCSS | Yes | No |
| SRR14540685 | chr13 | 32333283  | G                      | GA                                                               |  | <i>BRCA2</i>   | HL  | CCSS | Yes | No |
| SRR14541883 | chr13 | 32333283  | G                      | GA                                                               |  | <i>BRCA2</i>   | CNS | CCSS | No  | No |
| SRR14544818 | chr13 | 32333283  | G                      | GA                                                               |  | <i>BRCA2</i>   | ALL | CCSS | Yes | No |
| SRR14545086 | chr13 | 32333283  | G                      | GA                                                               |  | <i>BRCA2</i>   | ALL | CCSS | No  | No |
| SRR14545423 | chr13 | 32336660  | CTTATT                 | C                                                                |  | <i>BRCA2</i>   | ALL | CCSS | No  | No |
| SRR14544594 | chr13 | 32337160  | TAAAC                  | T                                                                |  | <i>BRCA2</i>   | NBL | CCSS | No  | No |
| SRR14540503 | chr13 | 32339287  | AAAAG                  | A                                                                |  | <i>BRCA2</i>   | STS | CCSS | No  | No |
| SRR14544591 | chr13 | 32339421  | C                      | CA                                                               |  | <i>BRCA2</i>   | OS  | CCSS | No  | No |

|             |       |          |                         |                                                                                                                   |                |     |      |     |     |
|-------------|-------|----------|-------------------------|-------------------------------------------------------------------------------------------------------------------|----------------|-----|------|-----|-----|
| SRR14541340 | chr13 | 32340113 | G                       | GT                                                                                                                | <i>BRCA2</i>   | HL  | CCSS | Yes | Yes |
| SRR14543077 | chr13 | 32340300 | GT                      | G                                                                                                                 | <i>BRCA2</i>   | OS  | CCSS | Yes | No  |
| SRR14543820 | chr13 | 32340300 | GT                      | G                                                                                                                 | <i>BRCA2</i>   | NHL | CCSS | Yes | No  |
| SRR14545042 | chr13 | 32340756 | ATAACT                  | A                                                                                                                 | <i>BRCA2</i>   | HL  | CCSS | Yes | Yes |
| SRR14542103 | chr13 | 32340951 | CTT                     | C                                                                                                                 | <i>BRCA2</i>   | ALL | CCSS | No  | No  |
| SRR14543063 | chr13 | 32355232 | A                       | AG                                                                                                                | <i>BRCA2</i>   | ALL | CCSS | No  | No  |
| SRR14541160 | chr13 | 32398184 | T                       | TA                                                                                                                | <i>BRCA2</i>   | NBL | CCSS | No  | No  |
| SRR14544884 | chr13 | 48456282 | A                       | ATGATTTTAGAAGG<br>ACCAGTGTCTGGTC<br>TAGTATCCACTTTG<br>GATTTTCATTCAGT<br>TCACTGACAGTATC<br>GTAAACTGGCCTAA<br>CTTGG | <i>RB1</i>     | CNS | CCSS | No  | No  |
| SRR14545399 | chr14 | 95103828 | C                       | CCTTTG                                                                                                            | <i>DICER1</i>  | ALL | CCSS | No  | No  |
| SRR14542518 | chr14 | 95115690 | GTTGA                   | G                                                                                                                 | <i>DICER1</i>  | STS | CCSS | No  | No  |
| SRR14541141 | chr16 | 2081780  | C                       | CT                                                                                                                | <i>TSC2</i>    | CNS | CCSS | No  | No  |
| SRR14542271 | chr16 | 2088292  | CCGGCTCCGC<br>CACATCAAG | C                                                                                                                 | <i>TSC2</i>    | CNS | CCSS | Yes | No  |
| SRR14541200 | chr16 | 23614088 | AT                      | A                                                                                                                 | <i>PALB2</i>   | CNS | CCSS | No  | No  |
| SRR14542505 | chr16 | 23614088 | AT                      | A                                                                                                                 | <i>PALB2</i>   | WT  | CCSS | No  | No  |
| SRR14540974 | chr16 | 23630229 | AT                      | A                                                                                                                 | <i>PALB2</i>   | WT  | CCSS | No  | No  |
| SRR14541623 | chr16 | 23634999 | CT                      | C                                                                                                                 | <i>PALB2</i>   | ALL | CCSS | No  | No  |
| SRR14544174 | chr16 | 23635504 | GTTCTT                  | G                                                                                                                 | <i>PALB2</i>   | ALL | CCSS | No  | No  |
| SRR14545243 | chr19 | 10986415 | GC                      | G                                                                                                                 | <i>SMARCA4</i> | CNS | CCSS | No  | No  |
| SRR14540838 | chr19 | 10986960 | GC                      | G                                                                                                                 | <i>SMARCA4</i> | CNS | CCSS | No  | No  |
| SRR14542749 | chr19 | 10996222 | GA                      | G                                                                                                                 | <i>SMARCA4</i> | ALL | CCSS | No  | No  |
| SRR14543115 | chr19 | 11013022 | TG                      | T                                                                                                                 | <i>SMARCA4</i> | ALL | CCSS | Yes | Yes |
| SRR14542102 | chr19 | 33302346 | C                       | CA                                                                                                                | <i>CEBPA</i>   | AML | CCSS | No  | No  |
| SRR14540877 | chr2  | 39067705 | G                       | GA                                                                                                                | <i>SOS1</i>    | HL  | CCSS | Yes | No  |
| SRR14545318 | chr2  | 47800056 | C                       | CA                                                                                                                | <i>MSH6</i>    | ALL | CCSS | No  | No  |
| SRR14544194 | chr2  | 47806605 | AAAGC                   | A                                                                                                                 | <i>MSH6</i>    | STS | CCSS | Yes | No  |
| SRR14540636 | chr3  | 10141988 | A                       | AGATGGTACACAAT<br>T                                                                                               | <i>VHL</i>     | ALL | CCSS | No  | No  |

|             |      |           |                   |                                                            |               |     |      |     |     |
|-------------|------|-----------|-------------------|------------------------------------------------------------|---------------|-----|------|-----|-----|
| SRR14544251 | chr3 | 37048505  | TCCTGCAAGC<br>AGG | T                                                          | <i>MLH1</i>   | AML | CCSS | No  | No  |
| SRR14541498 | chr3 | 52406895  | T                 | TC                                                         | <i>BAP1</i>   | STS | CCSS | No  | No  |
| SRR14542292 | chr3 | 52406895  | T                 | TC                                                         | <i>BAP1</i>   | ALL | CCSS | No  | No  |
| SRR14545100 | chr3 | 52406895  | T                 | TC                                                         | <i>BAP1</i>   | AML | CCSS | No  | No  |
| SRR14545320 | chr3 | 52406895  | T                 | TC                                                         | <i>BAP1</i>   | ALL | CCSS | No  | No  |
| SRR14542859 | chr5 | 251415    | GGA               | G                                                          | <i>SDHA</i>   | WT  | CCSS | No  | No  |
| SRR14540266 | chr7 | 5977632   | A                 | AAGGC                                                      | <i>PMS2</i>   | ALL | CCSS | No  | No  |
| SRR14545100 | chr7 | 5982837   | G                 | GC                                                         | <i>PMS2</i>   | AML | CCSS | No  | No  |
| SRR14541672 | chr7 | 5982880   | CT                | C                                                          | <i>PMS2</i>   | OS  | CCSS | No  | No  |
| SRR14543528 | chr7 | 5982880   | CT                | C                                                          | <i>PMS2</i>   | NHL | CCSS | No  | No  |
| SRR14541190 | chr7 | 5986933   | A                 | AT                                                         | <i>PMS2</i>   | NHL | CCSS | Yes | Yes |
| SRR14541419 | chr7 | 5986933   | A                 | AT                                                         | <i>PMS2</i>   | STS | CCSS | No  | No  |
| SRR14541354 | chr9 | 132903776 | AC                | A                                                          | <i>TSC1</i>   | CNS | CCSS | No  | No  |
| SRR14540849 | chr9 | 132903784 | CG                | C                                                          | <i>TSC1</i>   | CNS | CCSS | Yes | No  |
| SRR14542376 | chr9 | 132905590 | TCC               | T                                                          | <i>TSC1</i>   | ALL | CCSS | No  | No  |
| SRR14540299 | chr9 | 21974795  | A                 | AGGCTCCATGCTGC<br>TCCCCGCCGCC                              | <i>CDKN2A</i> | STS | CCSS | No  | No  |
| SRR14540653 | chr9 | 21974795  | A                 | AGGCTCCATGCTGC<br>TCCCCGCCGCC                              | <i>CDKN2A</i> | NHL | CCSS | Yes | Yes |
| SRR14544232 | chr9 | 21974795  | A                 | AGGCTCCATGCTGC<br>TCCCCGCCGCC                              | <i>CDKN2A</i> | CNS | CCSS | No  | No  |
| SRR14545117 | chr9 | 21974795  | A                 | AGGCTCCATGCTGC<br>TCCCCGCCGCC                              | <i>CDKN2A</i> | ALL | CCSS | No  | No  |
| SRR14545207 | chr9 | 21974795  | A                 | AGGCTCCATGCTGC<br>TCCCCGCCGCC                              | <i>CDKN2A</i> | HL  | CCSS | Yes | No  |
| SRR14541439 | chr9 | 95449266  | T                 | TG                                                         | <i>PTCH1</i>  | CNS | CCSS | No  | No  |
| SRR14541795 | chr9 | 95449266  | T                 | TG                                                         | <i>PTCH1</i>  | CNS | CCSS | No  | No  |
| SRR14544774 | chr9 | 95449266  | T                 | TG                                                         | <i>PTCH1</i>  | WT  | CCSS | No  | No  |
| SRR14544225 | chr9 | 95479082  | C                 | CAACCAGCGAGTCT<br>GCACGCCGATTCTGA<br>AGGTGGGTTTACCT<br>CCA | <i>PTCH1</i>  | STS | CCSS | No  | No  |
| SRR14542621 | chr9 | 95516816  | TC                | T                                                          | <i>PTCH1</i>  | OS  | CCSS | No  | No  |
| SRR14540387 | chr1 | 17028599  | C                 | T                                                          | <i>SDHB</i>   | STS | CCSS | No  | No  |

|             |       |           |   |   |               |       |      |     |     |
|-------------|-------|-----------|---|---|---------------|-------|------|-----|-----|
| SRR14544106 | chr1  | 17028736  | C | T | <i>SDHB</i>   | STS   | CCSS | Yes | No  |
| SRR14540480 | chr1  | 114716126 | C | T | <i>NRAS</i>   | WT    | CCSS | Yes | Yes |
| SRR14542973 | chr1  | 114716127 | C | T | <i>NRAS</i>   | Other | CCSS | No  | No  |
| SRR14542733 | chr1  | 17028605  | C | A | <i>SDHB</i>   | STS   | CCSS | No  | No  |
| SRR14542537 | chr1  | 241508643 | C | T | <i>FH</i>     | OS    | CCSS | No  | No  |
| SRR14541154 | chr10 | 43119548  | G | A | <i>RET</i>    | AML   | CCSS | No  | No  |
| SRR14543633 | chr10 | 43119548  | G | A | <i>RET</i>    | STS   | CCSS | No  | No  |
| SRR14543846 | chr10 | 87933198  | A | T | <i>PTEN</i>   | NHL   | CCSS | No  | No  |
| SRR14543986 | chr10 | 87957951  | C | T | <i>PTEN</i>   | STS   | CCSS | No  | No  |
| SRR14542824 | chr11 | 32392032  | G | A | <i>WT1</i>    | WT    | CCSS | No  | No  |
| SRR14544030 | chr11 | 32392032  | G | A | <i>WT1</i>    | WT    | CCSS | No  | No  |
| SRR14544755 | chr11 | 32392032  | G | A | <i>WT1</i>    | WT    | CCSS | No  | No  |
| SRR14544838 | chr11 | 32392717  | G | A | <i>WT1</i>    | WT    | CCSS | No  | No  |
| SRR14544275 | chr11 | 32428509  | G | A | <i>WT1</i>    | WT    | CCSS | No  | No  |
| SRR14545124 | chr11 | 32428568  | G | T | <i>WT1</i>    | WT    | CCSS | Yes | No  |
| SRR14543887 | chr11 | 64805141  | G | A | <i>MEN1</i>   | ALL   | CCSS | No  | No  |
| SRR14541145 | chr11 | 64807009  | A | G | <i>MEN1</i>   | ALL   | CCSS | No  | No  |
| SRR14545265 | chr11 | 119273867 | G | A | <i>CBL</i>    | CNS   | CCSS | Yes | No  |
| SRR14541591 | chr11 | 119278294 | G | A | <i>CBL</i>    | ALL   | CCSS | No  | No  |
| SRR14545243 | chr12 | 112477720 | A | G | <i>PTPN11</i> | CNS   | CCSS | No  | No  |
| SRR14543115 | chr12 | 112450408 | G | C | <i>PTPN11</i> | ALL   | CCSS | Yes | Yes |
| SRR14545435 | chr12 | 112453279 | G | C | <i>PTPN11</i> | ALL   | CCSS | No  | No  |
| SRR14541688 | chr12 | 112472968 | C | T | <i>PTPN11</i> | ALL   | CCSS | No  | No  |
| SRR14540747 | chr13 | 32338140  | C | G | <i>BRCA2</i>  | WT    | CCSS | No  | No  |
| SRR14540522 | chr13 | 32338577  | C | T | <i>BRCA2</i>  | ALL   | CCSS | Yes | No  |
| SRR14544699 | chr13 | 32338680  | C | A | <i>BRCA2</i>  | WT    | CCSS | No  | No  |
| SRR14540882 | chr13 | 32340000  | C | A | <i>BRCA2</i>  | STS   | CCSS | No  | No  |
| SRR14543798 | chr13 | 32363178  | G | C | <i>BRCA2</i>  | ALL   | CCSS | No  | No  |
| SRR14544906 | chr13 | 32380085  | C | T | <i>BRCA2</i>  | OS    | CCSS | No  | No  |
| SRR14545045 | chr13 | 32396896  | A | C | <i>BRCA2</i>  | ALL   | CCSS | No  | No  |
| SRR14545172 | chr13 | 48349024  | G | T | <i>RB1</i>    | OS    | CCSS | Yes | No  |
| SRR14541860 | chr13 | 32362595  | G | C | <i>BRCA2</i>  | ALL   | CCSS | No  | No  |
| SRR14542031 | chr13 | 32362595  | G | C | <i>BRCA2</i>  | OS    | CCSS | No  | No  |

|             |       |          |   |   |               |     |      |     |     |
|-------------|-------|----------|---|---|---------------|-----|------|-----|-----|
| SRR14544996 | chr13 | 32362595 | G | C | <i>BRCA2</i>  | HL  | CCSS | Yes | Yes |
| SRR14544911 | chr14 | 65006285 | C | T | <i>MAX</i>    | ALL | CCSS | No  | No  |
| SRR14542574 | chr14 | 95108323 | C | A | <i>DICER1</i> | WT  | CCSS | Yes | No  |
| SRR14540204 | chr14 | 95113166 | G | A | <i>DICER1</i> | STS | CCSS | Yes | No  |
| SRR14541733 | chr14 | 95116680 | G | A | <i>DICER1</i> | STS | CCSS | No  | No  |
| SRR14543449 | chr14 | 95133314 | C | T | <i>DICER1</i> | ALL | CCSS | No  | No  |
| SRR14544708 | chr16 | 23603471 | G | C | <i>PALB2</i>  | STS | CCSS | No  | No  |
| SRR14544241 | chr16 | 23621362 | C | T | <i>PALB2</i>  | ALL | CCSS | No  | No  |
| SRR14544827 | chr16 | 23635306 | G | A | <i>PALB2</i>  | ALL | CCSS | No  | No  |
| SRR14542211 | chr16 | 23635903 | C | A | <i>PALB2</i>  | ALL | CCSS | No  | No  |
| SRR14541394 | chr16 | 23637865 | G | A | <i>PALB2</i>  | ALL | CCSS | No  | No  |
| SRR14542638 | chr16 | 68808504 | G | A | <i>CDH1</i>   | ALL | CCSS | No  | No  |
| SRR14542589 | chr17 | 7670700  | G | A | <i>TP53</i>   | STS | CCSS | Yes | No  |
| SRR14540916 | chr17 | 7673704  | G | A | <i>TP53</i>   | ALL | CCSS | No  | No  |
| SRR14542318 | chr17 | 7673802  | C | T | <i>TP53</i>   | OS  | CCSS | Yes | Yes |
| SRR14541320 | chr17 | 7673803  | G | T | <i>TP53</i>   | OS  | CCSS | Yes | Yes |
| SRR14543594 | chr17 | 7674220  | C | T | <i>TP53</i>   | STS | CCSS | Yes | Yes |
| SRR14545222 | chr17 | 7674220  | C | T | <i>TP53</i>   | STS | CCSS | Yes | Yes |
| SRR14545301 | chr17 | 7674220  | C | T | <i>TP53</i>   | NHL | CCSS | Yes | Yes |
| SRR14545264 | chr17 | 7674230  | C | T | <i>TP53</i>   | CNS | CCSS | No  | No  |
| SRR14540979 | chr17 | 7675139  | C | T | <i>TP53</i>   | CNS | CCSS | Yes | No  |
| SRR14543532 | chr17 | 7675139  | C | T | <i>TP53</i>   | STS | CCSS | No  | No  |
| SRR14545140 | chr17 | 7675234  | G | T | <i>TP53</i>   | STS | CCSS | Yes | Yes |
| SRR14544268 | chr17 | 31200443 | C | T | <i>NF1</i>    | CNS | CCSS | No  | No  |
| SRR14544886 | chr17 | 31229457 | C | T | <i>NF1</i>    | CNS | CCSS | No  | No  |
| SRR14543000 | chr17 | 31230309 | A | T | <i>NF1</i>    | STS | CCSS | No  | No  |
| SRR14545505 | chr17 | 31235623 | C | T | <i>NF1</i>    | CNS | CCSS | No  | No  |
| SRR14545395 | chr17 | 31258353 | C | T | <i>NF1</i>    | NHL | CCSS | Yes | Yes |
| SRR14544353 | chr17 | 31326154 | C | T | <i>NF1</i>    | CNS | CCSS | No  | No  |
| SRR14543553 | chr17 | 31335016 | G | A | <i>NF1</i>    | CNS | CCSS | Yes | Yes |
| SRR14544864 | chr17 | 31352323 | T | G | <i>NF1</i>    | STS | CCSS | Yes | No  |
| SRR14542435 | chr17 | 31352348 | C | T | <i>NF1</i>    | CNS | CCSS | Yes | Yes |
| SRR14542992 | chr17 | 43049195 | C | T | <i>BRCA1</i>  | STS | CCSS | No  | No  |

|             |       |          |   |   |                |     |      |     |     |
|-------------|-------|----------|---|---|----------------|-----|------|-----|-----|
| SRR14541792 | chr17 | 43057051 | C | T | <i>BRCA1</i>   | NHL | CCSS | No  | No  |
| SRR14543942 | chr17 | 43063917 | A | C | <i>BRCA1</i>   | OS  | CCSS | No  | No  |
| SRR14545123 | chr17 | 43092326 | G | A | <i>BRCA1</i>   | ALL | CCSS | No  | No  |
| SRR14542325 | chr17 | 43095924 | T | G | <i>BRCA1</i>   | ALL | CCSS | No  | No  |
| SRR14543139 | chr17 | 43095924 | T | G | <i>BRCA1</i>   | ALL | CCSS | No  | No  |
| SRR14545399 | chr17 | 7673568  | C | A | <i>TP53</i>    | ALL | CCSS | No  | No  |
| SRR14544746 | chr17 | 31225134 | G | A | <i>NF1</i>     | NBL | CCSS | Yes | Yes |
| SRR14542790 | chr17 | 7675070  | C | T | <i>TP53</i>    | STS | CCSS | No  | No  |
| SRR14543385 | chr17 | 31223470 | A | G | <i>NF1</i>     | CNS | CCSS | No  | No  |
| SRR14542267 | chr17 | 43106487 | A | C | <i>BRCA1</i>   | STS | CCSS | Yes | No  |
| SRR14543845 | chr17 | 43106487 | A | C | <i>BRCA1</i>   | STS | CCSS | No  | No  |
| SRR14541487 | chr17 | 31221930 | G | A | <i>NF1</i>     | CNS | CCSS | No  | No  |
| SRR14540636 | chr18 | 51059880 | G | T | <i>SMAD4</i>   | ALL | CCSS | No  | No  |
| SRR14544599 | chr19 | 33302247 | G | T | <i>CEBPA</i>   | STS | CCSS | No  | No  |
| SRR14543142 | chr2  | 47375301 | T | C | <i>EPCAM</i>   | EWS | CCSS | No  | No  |
| SRR14542246 | chr2  | 47378952 | G | A | <i>EPCAM</i>   | HL  | CCSS | Yes | No  |
| SRR14542981 | chr2  | 47783243 | C | T | <i>MSH6</i>    | NBL | CCSS | No  | No  |
| SRR14541589 | chr2  | 47783493 | G | C | <i>MSH6</i>    | NHL | CCSS | No  | No  |
| SRR14542363 | chr2  | 47798839 | G | T | <i>MSH6</i>    | HL  | CCSS | Yes | No  |
| SRR14541816 | chr2  | 47804908 | A | G | <i>MSH6</i>    | ALL | CCSS | No  | No  |
| SRR14545100 | chr2  | 47806488 | C | T | <i>MSH6</i>    | AML | CCSS | No  | No  |
| SRR14542103 | chr2  | 47803473 | C | T | <i>MSH6</i>    | ALL | CCSS | No  | No  |
| SRR14545442 | chr22 | 23825261 | C | T | <i>SMARCB1</i> | AML | CCSS | No  | No  |
| SRR14544952 | chr22 | 29639088 | A | C | <i>NF2</i>     | OS  | CCSS | No  | No  |
| SRR14542839 | chr22 | 29661334 | A | T | <i>NF2</i>     | CNS | CCSS | Yes | No  |
| SRR14544085 | chr22 | 29683080 | G | A | <i>NF2</i>     | STS | CCSS | No  | No  |
| SRR14541394 | chr3  | 10149921 | C | T | <i>VHL</i>     | ALL | CCSS | No  | No  |
| SRR14542881 | chr3  | 10149921 | C | T | <i>VHL</i>     | AML | CCSS | No  | No  |
| SRR14543963 | chr3  | 10149921 | C | T | <i>VHL</i>     | WT  | CCSS | No  | No  |
| SRR14543702 | chr4  | 41746323 | C | T | <i>PHOX2B</i>  | NBL | CCSS | No  | No  |
| SRR14545624 | chr4  | 41748499 | G | A | <i>PHOX2B</i>  | HL  | CCSS | Yes | Yes |
| SRR14541195 | chr5  | 223509   | C | T | <i>SDHA</i>    | ALL | CCSS | No  | No  |
| SRR14541555 | chr5  | 223509   | C | T | <i>SDHA</i>    | WT  | CCSS | No  | No  |



|             |       |                   |                 |   |               |     |      |     |     |
|-------------|-------|-------------------|-----------------|---|---------------|-----|------|-----|-----|
| SRR14542396 | chr5  | 223509            | C               | T | <i>SDHA</i>   | HL  | CCSS | No  | No  |
| SRR14542503 | chr5  | 223509            | C               | T | <i>SDHA</i>   | ALL | CCSS | No  | No  |
| SRR14544655 | chr5  | 223509            | C               | T | <i>SDHA</i>   | HL  | CCSS | No  | No  |
| SRR14544727 | chr5  | 223509            | C               | T | <i>SDHA</i>   | STS | CCSS | No  | No  |
| SRR14545161 | chr5  | 223509            | C               | T | <i>SDHA</i>   | ALL | CCSS | No  | No  |
| SRR14544512 | chr5  | 112841156         | C               | G | <i>APC</i>    | ALL | CCSS | No  | No  |
| SRR14543553 | chr7  | 140794370         | G               | A | <i>BRAF</i>   | CNS | CCSS | Yes | Yes |
| SRR14542771 | chr7  | 6009019           | T               | C | <i>PMS2</i>   | WT  | CCSS | No  | No  |
| SRR14545004 | chr9  | 36846869          | C               | T | <i>PAX5</i>   | ALL | CCSS | No  | No  |
| SRR14543869 | chr9  | 36846931          | T               | A | <i>PAX5</i>   | ALL | CCSS | No  | No  |
| SRR14543570 | chr9  | 95476758          | C               | T | <i>PTCH1</i>  | ALL | CCSS | No  | No  |
| SRR14543586 | chr9  | 95516622          | C               | T | <i>PTCH1</i>  | ALL | CCSS | No  | No  |
| SRR14540418 | chr9  | 132902727         | C               | A | <i>TSC1</i>   | CNS | CCSS | No  | No  |
| SRR14541195 | chr9  | 21971200          | C               | G | <i>CDKN2A</i> | ALL | CCSS | No  | No  |
| SJCNS051108 | chr11 | 533512            | G               | A | <i>HRAS</i>   | CNS | CCSS | No  | No  |
| SJCNS051163 | chr17 | 31200443          | C               | T | <i>NF1</i>    | CNS | CCSS | No  | No  |
| SJCNS051170 | chr17 | 31258442          | A               | - | <i>NF1</i>    | CNS | CCSS | No  | No  |
| SJCNS051178 | chr17 | 31327840          | G               | T | <i>NF1</i>    | CNS | CCSS | No  | No  |
| SJCNS051191 | chr14 | 95096462          | -               | T | <i>DICER1</i> | CNS | CCSS | No  | No  |
| SJCNS051215 | chr5  | 112838978         | T               | - | <i>APC</i>    | CNS | CCSS | Yes | No  |
| SJCNS051258 | chr17 | 30668101-32085400 | CNV             |   | <i>NF1</i>    | CNS | CCSS | No  | No  |
| SJCNS051327 | chr17 | 31226476          | ACAA            | - | <i>NF1</i>    | CNS | CCSS | No  | No  |
| SJCNS051338 | chr17 | 31260370          | -               | T | <i>NF1</i>    | CNS | CCSS | No  | No  |
| SJCNS051342 | chr17 | 31249120          | G               | A | <i>NF1</i>    | CNS | CCSS | No  | No  |
| SJCNS051356 | chr17 | 43092801          | TTGA            | - | <i>BRCA1</i>  | CNS | CCSS | No  | No  |
| SJCNS051402 | chr17 | 31200531          | -               | A | <i>NF1</i>    | CNS | CCSS | No  | No  |
| SJCNS051412 | chr10 | 102593680         | G               | A | <i>SUFU</i>   | CNS | CCSS | No  | No  |
| SJCNS051475 | chr17 | 31230383          | G               | A | <i>NF1</i>    | CNS | CCSS | No  | No  |
| SJCNS051538 | chr17 | 43092040          | CTAGTATCTT<br>C | - | <i>BRCA1</i>  | CNS | CCSS | No  | No  |
| SJCNS051648 | chr10 | 102504243         | C               | - | <i>SUFU</i>   | CNS | CCSS | No  | No  |
| SJCNS051676 | chr17 | 31229457          | C               | T | <i>NF1</i>    | CNS | CCSS | Yes | No  |

|             |       |                       |      |               |                |     |      |     |     |
|-------------|-------|-----------------------|------|---------------|----------------|-----|------|-----|-----|
| SJCNS051697 | chr17 | 31227607              | G    | A             | <i>NF1</i>     | CNS | CCSS | No  | No  |
| SJCNS051708 | chr17 | 31265227              | A    | T             | <i>NF1</i>     | CNS | CCSS | No  | No  |
| SJCNS051798 | chr5  | 112819026             | C    | T             | <i>APC</i>     | CNS | CCSS | No  | No  |
| SJCNS051818 | chr17 | 31230383              | G    | C             | <i>NF1</i>     | CNS | CCSS | No  | No  |
| SJCNS051822 | chr17 | 31235963              | C    | T             | <i>NF1</i>     | CNS | CCSS | No  | No  |
| SJCNS051834 | chr17 | 31235963              | C    | T             | <i>NF1</i>     | CNS | CCSS | No  | No  |
| SJCNS051850 | chr10 | 102599545             | G    | A             | <i>SUFU</i>    | CNS | CCSS | No  | No  |
| SJCNS051856 | chr17 | 31349156              | CAGT | -             | <i>NF1</i>     | CNS | CCSS | No  | No  |
| SJCNS051995 | chr13 | 32339566              | TACT | -             | <i>BRCA2</i>   | CNS | CCSS | No  | No  |
| SJCNS052006 | chr10 | 102592722             | C    | T             | <i>SUFU</i>    | CNS | CCSS | No  | No  |
| SJCNS052131 | chr17 | 7675143               | C    | A             | <i>TP53</i>    | CNS | CCSS | No  | No  |
| SJCNS052218 | chr17 | 31261733              | C    | T             | <i>NF1</i>     | CNS | CCSS | Yes | No  |
| SJCNS052227 | chr17 | 31326248              | -    | T             | <i>NF1</i>     | CNS | CCSS | Yes | Yes |
| SJCNS052227 | chr22 | 29389601-<br>29874700 |      |               | <i>NF2</i>     | CNS | CCSS | Yes | Yes |
| SJCNS052349 | chr5  | 112707723             | C    | A             | <i>APC</i>     | CNS | CCSS | No  | No  |
| SJCNS052389 | chr17 | 31330471              | G    | T             | <i>NF1</i>     | CNS | CCSS | No  | No  |
| SJCNS052470 | chr17 | 31258502              | G    | -             | <i>NF1</i>     | CNS | CCSS | Yes | No  |
| SJCNS052520 | chr17 | 31233030              | AA   | -             | <i>NF1</i>     | CNS | CCSS | No  | No  |
| SJCNS052539 | chr5  | 223509                | C    | T             | <i>SDHA</i>    | CNS | CCSS | No  | No  |
| SJCNS052583 | chr17 | 30777501-<br>31984600 | CNV  |               | <i>NF1</i>     | CNS | CCSS | No  | No  |
| SJCNS052881 | chr5  | 223509                | C    | T             | <i>SDHA</i>    | CNS | CCSS | No  | No  |
| SJCNS052886 | chr14 | 95104037              | -    | TTATTAGTTCTGG | <i>DICER1</i>  | CNS | CCSS | No  | No  |
| SJCNS052952 | chr17 | 31230911              | A    | -             | <i>NF1</i>     | CNS | CCSS | No  | No  |
| SJCNS053010 | chr9  | 132905844             | -    | G             | <i>TSC1</i>    | CNS | CCSS | No  | No  |
| SJCNS053019 | chr16 | 2085233               | C    | T             | <i>TSC2</i>    | CNS | CCSS | No  | No  |
| SJCNS053085 | chr17 | 31229136              | AC   | -             | <i>NF1</i>     | CNS | CCSS | No  | No  |
| SJCNS053132 | chr22 | 23793672              | -    | C             | <i>SMARCB1</i> | CNS | CCSS | Yes | No  |
| SJCNS053143 | chr17 | 31091601-<br>31098700 |      |               | <i>NF1</i>     | CNS | CCSS | No  | No  |
| SJCNS053170 | chr17 | 31206239              | G    | T             | <i>NF1</i>     | CNS | CCSS | No  | No  |
| SJCNS053205 | chr17 | 31233025              | C    | T             | <i>NF1</i>     | CNS | CCSS | No  | No  |

|               |       |                   |      |      |               |       |      |     |    |
|---------------|-------|-------------------|------|------|---------------|-------|------|-----|----|
| SJCNS053263   | chr2  | 47397501-47420000 |      |      | <i>MSH2</i>   | CNS   | CCSS | No  | No |
| SJCNS053326   | chr17 | 43124028          | CT   | -    | <i>BRCA1</i>  | CNS   | CCSS | No  | No |
| SJCNS053348   | chr17 | 31249093          | C    | T    | <i>NF1</i>    | CNS   | CCSS | No  | No |
| SJCNS053360   | chr13 | 32380124          | G    | -    | <i>BRCA2</i>  | CNS   | CCSS | No  | No |
| SJCNS053423   | chr17 | 31352381          | C    | T    | <i>NF1</i>    | CNS   | CCSS | No  | No |
| SJCNS053537   | chr17 | 31223476          | TAAC | -    | <i>NF1</i>    | CNS   | CCSS | No  | No |
| SJCNS053576   | chr14 | 95124660          | -    | T    | <i>DICER1</i> | CNS   | CCSS | No  | No |
| SJCNS053614   | chr2  | 47799618          | AG   | -    | <i>MSH6</i>   | CNS   | CCSS | Yes | No |
| SJCNS053680   | chr14 | 95108323          | -    | C    | <i>DICER1</i> | CNS   | CCSS | No  | No |
| SJCNS053752   | chr17 | 31225126          | -    | T    | <i>NF1</i>    | CNS   | CCSS | No  | No |
| SJCNS053956   | chr17 | 31325833          | C    | T    | <i>NF1</i>    | CNS   | CCSS | No  | No |
| SJCNS054357   | chr17 | 31219018          | AG   | -    | <i>NF1</i>    | CNS   | CCSS | No  | No |
| SJGENBN051304 | chr11 | 112093129         | C    | T    | <i>SDHD</i>   | Other | CCSS | No  | No |
| SJGENBN051662 | chr3  | 36993563          | G    | -    | <i>MLH1</i>   | OS    | CCSS | No  | No |
| SJGENBN051953 | chr1  | 193212395         | C    | T    | <i>CDC73</i>  | EWS   | CCSS | No  | No |
| SJGENBN053395 | chr16 | 23635000          | T    | -    | <i>PALB2</i>  | EWS   | CCSS | No  | No |
| SJGENBN053829 | chr2  | 47806497          | -    | ATTA | <i>MSH6</i>   | OS    | CCSS | No  | No |
| SJGENKY051239 | chr11 | 32392020          | G    | A    | <i>WT1</i>    | WT    | CCSS | No  | No |
| SJGENKY051394 | chr11 | 32434847          | G    | A    | <i>WT1</i>    | WT    | CCSS | No  | No |
| SJGENKY051427 | chr11 | 32428550          | -    | A    | <i>WT1</i>    | WT    | CCSS | No  | No |
| SJGENKY051753 | chr11 | 32399947          | C    | -    | <i>WT1</i>    | WT    | CCSS | No  | No |
| SJGENKY051866 | chr12 | 112489047         | C    | T    | <i>PTPN11</i> | WT    | CCSS | No  | No |
| SJGENKY051985 | chr11 | 32434815          | -    | A    | <i>WT1</i>    | WT    | CCSS | No  | No |
| SJGENKY052394 | chr2  | 47465801-47474300 | CNV  |      | <i>MSH2</i>   | WT    | CCSS | No  | No |
| SJGENKY052648 | chr11 | 32392032          | G    | A    | <i>WT1</i>    | WT    | CCSS | No  | No |
| SJGENKY052729 | chr3  | 10142001          | G    | T    | <i>VHL</i>    | WT    | CCSS | No  | No |
| SJGENKY053253 | chr9  | 95516747          | G    | -    | <i>PTCH1</i>  | WT    | CCSS | No  | No |
| SJGENKY053478 | chr11 | 32392032          | G    | A    | <i>WT1</i>    | WT    | CCSS | No  | No |
| SJGENKY053702 | chr16 | 23635306          | G    | A    | <i>PALB2</i>  | WT    | CCSS | No  | No |
| SJGENKY053853 | chr11 | 32396401          | G    | A    | <i>WT1</i>    | WT    | CCSS | No  | No |
| SJGENKY054132 | chr5  | 217301-224700     | CNV  |      | <i>SDHA</i>   | WT    | CCSS | No  | No |

|               |       |                   |      |      |                |     |      |     |    |
|---------------|-------|-------------------|------|------|----------------|-----|------|-----|----|
| SJGENKY054260 | chr10 | 87957955          | C    | T    | <i>PTEN</i>    | WT  | CCSS | No  | No |
| SJGENLK051278 | chr12 | 112489086         | A    | G    | <i>PTPN11</i>  | ALL | CCSS | No  | No |
| SJGENLK051351 | chr5  | 248901-262200     | CNV  |      | <i>SDHA</i>    | ALL | CCSS | No  | No |
| SJGENLK051562 | chr9  | 20571601-22496500 | CNV  |      | <i>CDKN2A</i>  | ALL | CCSS | No  | No |
| SJGENLK052255 | chr16 | 23623044          | TT   | -    | <i>PALB2</i>   | AML | CCSS | No  | No |
| SJGENLK052479 | chr7  | 6009018           | A    | T    | <i>PMS2</i>    | AML | CCSS | No  | No |
| SJGENLK052905 | chr2  | 47375300          | G    | A    | <i>EPCAM</i>   | ALL | CCSS | No  | No |
| SJGENLK053196 | chr12 | 112477719         | A    | G    | <i>PTPN11</i>  | ALL | CCSS | No  | No |
| SJGENLK053199 | chr19 | 10956701-10962700 | CNV  |      | <i>SMARCA4</i> | ALL | CCSS | No  | No |
| SJGENLK053424 | chr19 | 33302347          | -    | G    | <i>CEBPA</i>   | AML | CCSS | No  | No |
| SJGENLK053562 | chr12 | 112450368         | A    | G    | <i>PTPN11</i>  | ALL | CCSS | No  | No |
| SJGENLK054165 | chr10 | 43119548          | G    | A    | <i>RET</i>     | ALL | CCSS | No  | No |
| SJGENLK054381 | chr13 | 32370955          | G    | A    | <i>BRCA2</i>   | ALL | CCSS | No  | No |
| SJHL051598    | chr13 | 32332668          | -    | TTAG | <i>BRCA2</i>   | HL  | CCSS | No  | No |
| SJHL052518    | chr11 | 64804588          | G    | A    | <i>MEN1</i>    | HL  | CCSS | No  | No |
| SJHL052760    | chr2  | 47377078          | G    | C    | <i>EPCAM</i>   | HL  | CCSS | No  | No |
| SJHL052786    | chr13 | 32339320          | C    | G    | <i>BRCA2</i>   | HL  | CCSS | No  | No |
| SJHL053080    | chr13 | 32333310          | C    | A    | <i>BRCA2</i>   | HL  | CCSS | No  | No |
| SJHL053084    | chr16 | 23636336          | T    | C    | <i>PALB2</i>   | HL  | CCSS | No  | No |
| SJHL053343    | chr9  | 95446392          | C    | T    | <i>PTCH1</i>   | HL  | CCSS | No  | No |
| SJHL053539    | chr16 | 23637886          | ACAA | -    | <i>PALB2</i>   | HL  | CCSS | No  | No |
| SJNBL051179   | chr17 | 31335032          | G    | T    | <i>NF1</i>     | NBL | CCSS | No  | No |
| SJNBL051231   | chr10 | 102599545         | G    | A    | <i>SUFU</i>    | NBL | CCSS | No  | No |
| SJNBL051322   | chr2  | 47801123          | G    | A    | <i>MSH6</i>    | NBL | CCSS | No  | No |
| SJNBL051590   | chr17 | 31200484          | AG   | -    | <i>NF1</i>     | NBL | CCSS | No  | No |
| SJNBL051835   | chr17 | 43094685          | TGAG | -    | <i>BRCA1</i>   | NBL | CCSS | No  | No |
| SJNBL052180   | chr13 | 32337651          | C    | G    | <i>BRCA2</i>   | NBL | CCSS | Yes | No |
| SJNBL052199   | chr19 | 4101244           | G    | A    | <i>MAP2K2</i>  | NBL | CCSS | No  | No |
| SJNBL052602   | chr5  | 240459            | C    | T    | <i>SDHA</i>    | NBL | CCSS | No  | No |
| SJNBL054237   | chr19 | 11041413          | C    | -    | <i>SMARCA4</i> | NBL | CCSS | Yes | No |
| SJNHL051409   | chr17 | 7670700           | G    | A    | <i>TP53</i>    | NHL | CCSS | No  | No |

|             |       |           |      |   |                |     |      |     |    |
|-------------|-------|-----------|------|---|----------------|-----|------|-----|----|
| SJNHL051684 | chr2  | 47803473  | C    | T | <i>MSH6</i>    | NHL | CCSS | No  | No |
| SJNHL052138 | chr3  | 10142001  | G    | T | <i>VHL</i>     | NHL | CCSS | No  | No |
| SJNHL052192 | chr19 | 11034177  | G    | T | <i>SMARCA4</i> | NHL | CCSS | No  | No |
| SJNHL052326 | chr11 | 119297033 | C    | T | <i>CBL</i>     | NHL | CCSS | No  | No |
| SJNHL053027 | chr13 | 32332740  | A    | - | <i>BRCA2</i>   | NHL | CCSS | No  | No |
| SJNHL053274 | chr13 | 32340301  | T    | - | <i>BRCA2</i>   | NHL | CCSS | No  | No |
| SJNHL053418 | chr17 | 43124028  | CT   | - | <i>BRCA1</i>   | NHL | CCSS | No  | No |
| SJSTS051335 | chr17 | 43092849  | TTTC | - | <i>BRCA1</i>   | STS | CCSS | No  | No |
| SJSTS051345 | chr2  | 47373471  | TG   | - | <i>EPCAM</i>   | STS | CCSS | No  | No |
| SJSTS051449 | chr16 | 23636036  | TC   | - | <i>PALB2</i>   | STS | CCSS | No  | No |
| SJSTS051860 | chr2  | 47803501  | C    | - | <i>MSH6</i>    | STS | CCSS | No  | No |
| SJSTS051865 | chr12 | 112450389 | A    | G | <i>PTPN11</i>  | STS | CCSS | No  | No |
| SJSTS052573 | chr16 | 23629897  | G    | A | <i>PALB2</i>   | STS | CCSS | No  | No |
| SJSTS052665 | chr13 | 32340301  | T    | - | <i>BRCA2</i>   | STS | CCSS | No  | No |
| SJSTS053098 | chr12 | 57748590  | G    | A | <i>CDK4</i>    | STS | CCSS | No  | No |
| SJSTS053659 | chr17 | 7674220   | C    | T | <i>TP53</i>    | STS | CCSS | Yes | No |
| SJSTS053817 | chr2  | 47373571  | G    | T | <i>EPCAM</i>   | STS | CCSS | No  | No |
| SJSTS053942 | chr17 | 31206323  | -    | T | <i>NF1</i>     | STS | CCSS | No  | No |
| SJSTS054223 | chr17 | 7675993   | C    | T | <i>TP53</i>    | STS | CCSS | No  | No |
| SJSTS054343 | chr17 | 7674230   | C    | T | <i>TP53</i>    | STS | CCSS | No  | No |
| SJSTS054384 | chr11 | 64808086  | -    | A | <i>MEN1</i>    | STS | CCSS | No  | No |
| SJSTS054384 | chr12 | 112450497 | A    | C | <i>PTPN11</i>  | STS | CCSS | No  | No |

Abbreviations: CPG, Cancer Predisposition Genes; SJLIFE, the St. Jude Lifetime Cohort Study; CCSS, the Childhood Cancer Survivor Study; SMN, Subsequent malignant neoplasm; ALL, Acute Lymphoblastic Leukemia; AML, Acute Myeloid Leukemia; HL, Hodgkin Lymphoma; NHL, Non-Hodgkin Lymphoma; CNS, Central Nervous System; WT, Wilms Tumor; NBL, Neuroblastoma; RB, Retinoblastoma; GCT, Germ Cell Tumor; OS, Osteosarcoma; RMS, Rhabdomyosarcoma; EWS, Ewing sarcoma family of tumors; STS, Soft Tissue Sarcoma; Other, other malignancies. SMN, subsequent malignant neoplasm

**Supplementary Table 6. Subsequent malignant neoplasms (SMNs) diagnosed among all survivors.**

| <b>SMN diagnosis group</b>   | <b>SJLIFE</b> | <b>CCSS</b> | <b>Combined, N</b> | <b>Combined, %</b> |
|------------------------------|---------------|-------------|--------------------|--------------------|
| <b>Other Solid Tumors</b>    | 93            | 269         | 362                | 31.15              |
| <b>Breast Cancer</b>         | 51            | 199         | 250                | 21.51              |
| <b>Thyroid Cancer</b>        | 79            | 145         | 224                | 19.28              |
| <b>Unspecified Sites</b>     | 0             | 99          | 99                 | 8.52               |
| <b>Sarcoma</b>               | 39            | 43          | 82                 | 7.06               |
| <b>Hematological Cancers</b> | 21            | 56          | 77                 | 6.63               |
| <b>CNS Tumors</b>            | 15            | 53          | 68                 | 5.85               |
| <b>Total</b>                 | 298           | 864         | 1162               | 100.00             |

Abbreviations: SJLIFE, the St. Jude Lifetime Cohort Study; CCSS, the Childhood Cancer Survivor Study; CNS, Central Nervous System.

Note: nearly all basal cell carcinomas are non-malignant and hence were not included in this table.

**Supplementary Table 7. Subsequent malignant neoplasms (SMNs) among CPV carriers and non-carriers in the SJLIFE study.**

| <b>SMN</b>           | <b>Non-CPV carriers, n (%)</b> | <b>CPV carriers, n (%)</b> |
|----------------------|--------------------------------|----------------------------|
| Breast Cancer        | 46 (16.9)                      | 5 (19.2)                   |
| Hematological Cancer | 21 (7.7)                       | 0 (0)                      |
| Meningioma           | 2 (0.7)                        | 1 (3.8)                    |
| Sarcoma              | 27 (9.9)                       | 12 (46.2)                  |
| Thyroid Cancer       | 76 (27.9)                      | 3 (11.5)                   |
| Other                | 100 (36.8)                     | 5 (19.2)                   |
| Total                | 272(100)                       | 26(100)                    |

Abbreviations: SJLIFE, the St. Jude Lifetime Cohort Study; SMN, Subsequent Malignant Neoplasm; CPV, Cancer Predisposition Variants.  
Note: The types of SMN differ significantly between CPV carriers and non-carriers based on Fisher's Exact Test ( $P<0.001$ ).

**Supplementary Table 8. Subsequent malignant neoplasms (SMNs) among CPV carriers and non-carriers in the CCSS study.**

| <b>SMN</b>           | <b>Non-CPV carriers, n (%)</b> | <b>CPV carriers, n (%)</b> |
|----------------------|--------------------------------|----------------------------|
| Breast Cancer        | 191 (23.7)                     | 8 (13.8)                   |
| Hematological Cancer | 54 (6.7)                       | 2 (3.5)                    |
| CNS Tumors           | 57 (7.1)                       | 13 (22.4)                  |
| Sarcoma              | 36 (4.5)                       | 7 (12.1)                   |
| Thyroid Cancer       | 140 (17.4)                     | 5(8.6)                     |
| Other                | 328 (40.7)                     | 23 (39.7)                  |
| Total                | 806 (100)                      | 58 (100)                   |

Abbreviations: CCSS, the Childhood Cancer Survivor Study; SMN, Subsequent Malignant Neoplasm; CPV, Cancer Predisposition Variants; CNS, Central nervous system. Note: The types of SMN differ significantly between CPV carriers and non-carriers based on Fisher’s Exact Test (P<0.001).



**Supplementary Table 9. Subsequent malignant neoplasms (SMNs) diagnosed among survivors who died from SMNs.**

| <b>SMN diagnosis group</b>   | <b>SJLIFE</b> | <b>CCSS</b> | <b>Combined, N</b> | <b>Combined, %</b> |
|------------------------------|---------------|-------------|--------------------|--------------------|
| <b>Other Solid Tumors</b>    | 20            | 94          | 114                | 43.35              |
| <b>CNS Tumors</b>            | 10            | 37          | 47                 | 17.87              |
| <b>Unspecified Sites</b>     | 6             | 37          | 43                 | 16.35              |
| <b>Hematological Cancers</b> | 7             | 23          | 30                 | 11.41              |
| <b>Breast Cancer</b>         | 1             | 28          | 29                 | 11.03              |
| <b>Total</b>                 | <b>44</b>     | <b>219</b>  | <b>263</b>         | <b>100</b>         |

Abbreviations: SJLIFE, the St. Jude Lifetime Cohort Study; CCSS, the Childhood Cancer Survivor Study; CNS, Central Nervous System.

**Supplementary Table 10. Standardized mortality ratio and absolute excess risk by comparing survivors of childhood cancer with CDC database.**

| Cohort   | CPV carriers | Death due to SMNs |          |                   |                            | Death due to other causes |          |                |                            | All-cause death |          |                 |                            |
|----------|--------------|-------------------|----------|-------------------|----------------------------|---------------------------|----------|----------------|----------------------------|-----------------|----------|-----------------|----------------------------|
|          |              | Observed          | Expected | SMR               | AER per 1,000 person years | Observed                  | Expected | SMR            | AER per 1,000 person years | Observed        | Expected | SMR             | AER per 1,000 person years |
| SJLIFE   | Overall      | 44                | 9.3      | 4.7 (3.4, 6.4)    | 1.2 (0.8, 1.7)             | 103                       | 44       | 2.3 (1.9, 2.8) | 2.1 (1.4, 2.8)             | 174             | 54.2     | 3.2 (2.8, 3.7)  | 4.2 (3.3, 5.1)             |
|          | Non-carriers | 38                | 8.9      | 4.3 (3.0, 5.8)    | 1.1 (0.7, 1.6)             | 96                        | 41.9     | 2.3 (1.9, 2.8) | 2.0 (1.3, 2.8)             | 158             | 51.7     | 3.1 (2.6, 3.6)  | 3.9 (3.0, 4.9)             |
|          | Carriers     | 6                 | 0.4      | 16.5 (6.0, 36.0)  | 3.3 (1.1, 7.5)             | 7                         | 2.1      | 3.4 (1.4, 6.9) | 2.9 (0.4, 7.3)             | 16              | 2.5      | 6.5 (3.7, 10.5) | 7.9 (3.9, 13.8)            |
| CCSS     | Overall      | 219               | 34.9     | 6.3 (5.5, 7.2)    | 2.2 (1.9, 2.6)             | 325.                      | 140.     | 2.3 (2.1, 2.6) | 2.2 (1.8, 2.7)             | 593.            | 175.     | 3.4 (3.1, 3.7)  | 5.0 (4.4, 5.6)             |
|          | Non-carriers | 197               | 33.7     | 5.9 (5.1, 6.7)    | 2.0 (1.7, 2.4)             | 305.                      | 135.     | 2.3 (2.0, 2.5) | 2.1 (1.7, 2.6)             | 548.            | 169.     | 3.2 (3.0, 3.5)  | 4.7 (4.2, 5.3)             |
|          | Carriers     | 22                | 1.2      | 18.2 (11.4, 27.6) | 6.3 (3.8, 9.7)             | 20                        | 5.1      | 3.9 (2.4, 6.0) | 4.5 (2.1, 7.8)             | 45              | 6.4      | 7.1 (5.2, 9.5)  | 11.6 (8.0, 16.2)           |
| Combined | Overall      | 263               | 44.3     | 5.9 (5.2, 6.7)    | 1.9 (1.7, 2.2)             | 428.                      | 184.     | 2.3 (2.1, 2.6) | 2.2 (1.8, 2.5)             | 767.            | 230      | 3.3 (3.1, 3.6)  | 4.8 (4.3, 5.3)             |
|          | Non-carriers | 235               | 42.8     | 5.5 (4.8, 6.2)    | 1.8 (1.5, 2.1)             | 401.                      | 177.     | 2.3 (2.1, 2.5) | 2.1 (1.7, 2.5)             | 706.            | 221.     | 3.2 (3.0, 3.4)  | 4.5 (4.0, 5.0)             |
|          | Carriers     | 28                | 1.6      | 17.8 (11.9, 25.8) | 5.3 (3.4, 7.7)             | 27                        | 7.2      | 3.7 (2.5, 5.4) | 3.9 (2.1, 6.4)             | 61              | 8.8      | 6.9 (5.3, 8.9)  | 10.4 (7.5, 13.8)           |

Abbreviations: SMR, Standardized Mortality Ratio; AER, Absolute Excess risk; SMN, Subsequent Malignant Neoplasms; SJLIFE, the St. Jude Lifetime Cohort Study; CCSS, the Childhood Cancer Survivor Study; CPV, Cancer Predisposing Variant; CDC, Centers for Disease Control and Prevention.

**Supplementary Table 11. Cumulative incidence of mortality for survivors in SJLIFE.**

| Variable              | Time since date of the first biospecimen collection | CPV non-carriers |           | CPV carriers |           | P-value |
|-----------------------|-----------------------------------------------------|------------------|-----------|--------------|-----------|---------|
|                       |                                                     | CIF              | 95%CI     | CIF          | 95%CI     |         |
| All-cause mortality   | 5                                                   | 2.3              | 1.8- 2.9  | 5.7          | 3.0- 9.7  | 0.055   |
|                       | 10                                                  | 6.4              | 5.4- 7.6  | 9.3          | 5.2- 14.8 |         |
|                       | 15                                                  | 8.3              | 6.5- 10.3 |              |           |         |
| SMN-related mortality | 5                                                   | 0.6              | 0.4- 0.9  | 1.3          | 0.3- 3.7  | 0.029   |
|                       | 10                                                  | 1.5              | 1.0- 2.1  | 3.7          | 1.2- 8.5  |         |
|                       | 15                                                  | 2.0              | 1.1- 3.5  |              |           |         |
| Other-cause mortality | 5                                                   | 1.6              | 1.2- 2.1  | 2.7          | 1.0- 6.0  | 0.70    |
|                       | 10                                                  | 3.8              | 3.1- 4.7  | 4.0          | 1.8- 7.8  |         |
|                       | 15                                                  | 4.0              | 3.2- 4.9  |              |           |         |

Abbreviations: SJLIFE, the St. Jude Lifetime Cohort Study; CPV, Cancer Predisposition Variant; CIF, Cumulative Incidence Function; 95%CI, 95% Confidence Interval.

**Supplementary Table 12. Cumulative incidence of mortality for survivors in CCSS.**

| Variable              | Time since date of the first biospecimen collection | No CPV carriers |           | CPV carriers |            | P-value |
|-----------------------|-----------------------------------------------------|-----------------|-----------|--------------|------------|---------|
|                       |                                                     | CIF             | 95%CI     | CIF          | 95%CI      |         |
| All-cause mortality   | 5                                                   | 2.5             | 2.1- 2.8  | 6.8          | 4.1- 10.3  | <0.0001 |
|                       | 10                                                  | 6.0             | 5.4- 6.7  | 11.2         | 7.5- 15.6  |         |
|                       | 15                                                  | 10.0            | 9.2- 10.9 | 19.1         | 14.0- 24.8 |         |
| SMN-related mortality | 5                                                   | 0.8             | 0.6- 1.1  | 3.9          | 2.0- 6.9   | <0.0001 |
|                       | 10                                                  | 2.1             | 1.7- 2.5  | 6.9          | 4.1- 10.7  |         |
|                       | 15                                                  | 3.6             | 3.0- 4.1  | 9.3          | 5.8- 13.7  |         |
| Other-cause mortality | 5                                                   | 1.4             | 1.1- 1.7  | 2.9          | 1.4- 5.5   | 0.062   |
|                       | 10                                                  | 3.4             | 2.9- 3.9  | 4.4          | 2.3- 7.6   |         |
|                       | 15                                                  | 5.6             | 5.0- 6.3  | 8.3          | 5.1- 12.6  |         |

Abbreviations: CCSS, the Childhood Cancer Survivor Study; CPV, Cancer Predisposition Variant; CIF, Cumulative Incidence Function; 95%CI, 95% Confidence Interval.

**Supplementary Table 13. Non-genetic multivariable regression model of mortality risk combining the two cohorts.**

| Status                       | Variable            | Category          | Excluding CPV in the model |                  |
|------------------------------|---------------------|-------------------|----------------------------|------------------|
|                              |                     |                   | HR (95% CI)                | P-value          |
| <b>All-cause mortality</b>   | Age at diagnosis    | 5-9 vs 0-4        | 1.06 (0.85-1.32)           | 0.63             |
|                              |                     | 10-14 vs 0-4      | 1.50 (1.22-1.84)           | <b>0.0001</b>    |
|                              |                     | >=15 vs 0-4       | 2.11 (1.72-2.60)           | <b>&lt;.0001</b> |
|                              | YRI                 |                   | 1.01 (0.66-1.55)           | 0.97             |
|                              | ASA                 |                   | 0.40 (0.13-1.27)           | 0.12             |
|                              | Sex                 | Male vs Female    | 1.12 (0.97-1.29)           | 0.12             |
|                              | Cohort              | CCSS vs SJLIFE    | 0.72 (0.59-0.87)           | <b>0.0011</b>    |
|                              | Chest RT            | >0 to <20 Gy vs 0 | 2.06 (1.66-2.55)           | <b>&lt;.0001</b> |
|                              |                     | >=20 Gy vs 0      | 3.91 (3.15-4.87)           | <b>&lt;.0001</b> |
|                              |                     | Unknown vs 0      | 1.96 (1.27-3.05)           | <b>0.0026</b>    |
|                              | Alkylating agents   | 1st tertile vs 0  | 1.10 (0.83-1.44)           | 0.52             |
|                              |                     | 2nd tertile vs 0  | 1.33 (1.07-1.67)           | <b>0.012</b>     |
|                              |                     | 3rd tertile vs 0  | 1.41 (1.16-1.73)           | <b>0.0006</b>    |
|                              |                     | Unknown vs 0      | 1.30 (0.95-1.77)           | 0.10             |
|                              | Anthracyclines      | 1st tertile vs 0  | 0.50 (0.36-0.71)           | <b>&lt;.0001</b> |
|                              |                     | 2nd tertile vs 0  | 0.62 (0.48-0.81)           | <b>0.0004</b>    |
|                              |                     | 3rd tertile vs 0  | 0.84 (0.67-1.06)           | 0.13             |
|                              |                     | Unknown vs 0      | 0.83 (0.51-1.35)           | 0.45             |
|                              | Epidodophyllotoxins | 1st tertile vs 0  | 0.88 (0.56-1.38)           | 0.58             |
|                              |                     | 2nd tertile vs 0  | 0.41 (0.22-0.76)           | <b>0.0043</b>    |
|                              |                     | 3rd tertile vs 0  | 0.58 (0.34-0.98)           | <b>0.040</b>     |
| Unknown vs 0                 |                     | 1.49 (0.86-2.60)  | 0.16                       |                  |
| <b>SMN-related mortality</b> | Age at diagnosis    | 5-9 vs 0-4        | 1.17 (0.76-1.79)           | 0.48             |
|                              |                     | 10-14 vs 0-4      | 2.05 (1.40-3.00)           | <b>0.0002</b>    |
|                              |                     | >=15 vs 0-4       | 3.58 (2.46-5.20)           | <b>&lt;.0001</b> |
|                              | YRI                 |                   | 0.95 (0.41-2.18)           | 0.90             |
|                              | ASA                 |                   | 0.68 (0.24-1.91)           | 0.46             |
|                              | Sex                 | Male vs Female    | 0.99 (0.77-1.26)           | 0.91             |
|                              | Cohort              | CCSS vs SJLIFE    | 1.08 (0.73-1.59)           | 0.70             |
|                              | Chest RT            | >0 to <20 Gy vs 0 | 2.28 (1.55-3.36)           | <b>&lt;.0001</b> |
|                              |                     | >=20 Gy vs 0      | 3.84 (2.59-5.70)           | <b>&lt;.0001</b> |
|                              |                     | Unknown vs 0      | 3.16 (1.60-6.23)           | <b>0.0009</b>    |
|                              | Alkylating agents   | 1st tertile vs 0  | 1.04 (0.63-1.70)           | 0.89             |

| Status | Variable            | Category          | Excluding CPV in the model |                  |
|--------|---------------------|-------------------|----------------------------|------------------|
|        |                     |                   | HR (95% CI)                | P-value          |
|        |                     | 2nd tertile vs 0  | 1.76 (1.23-2.51)           | <b>0.0019</b>    |
|        |                     | 3rd tertile vs 0  | 1.64 (1.16-2.31)           | <b>0.0051</b>    |
|        |                     | Unknown vs 0      | 1.68 (1.08-2.60)           | <b>0.021</b>     |
|        | Anthracyclines      | 1st tertile vs 0  | 0.40 (0.21-0.77)           | <b>0.0055</b>    |
|        |                     | 2nd tertile vs 0  | 0.57 (0.37-0.88)           | <b>0.011</b>     |
|        |                     | 3rd tertile vs 0  | 0.74 (0.50-1.08)           | 0.12             |
|        |                     | Unknown vs 0      | 0.96 (0.46-1.98)           | 0.90             |
|        | Epipodophyllotoxins | 1st tertile vs 0  | 1.07 (0.49-2.32)           | 0.87             |
|        |                     | 2nd tertile vs 0  | 0.28 (0.07-1.19)           | 0.08             |
|        |                     | 3rd tertile vs 0  | 0.54 (0.19-1.57)           | 0.26             |
|        |                     | Unknown vs 0      | 0.43 (0.15-1.22)           | 0.11             |
|        |                     | 10-14 vs 0-4      | 1.26 (0.96-1.65)           | 0.10             |
|        |                     | >=15 vs 0-4       | 1.44 (1.09-1.90)           | <b>0.011</b>     |
|        | YRI                 |                   | 1.15 (0.66-1.98)           | 0.63             |
|        | ASA                 |                   | 0.33 (0.06-1.73)           | 0.19             |
|        | Sex                 | Male vs Female    | 1.29 (1.06-1.56)           | <b>0.0093</b>    |
|        | Cohort              | CCSS vs SJLIFE    | 0.70 (0.54-0.92)           | <b>0.011</b>     |
|        | Chest RT            | >0 to <20 Gy vs 0 | 1.87 (1.41-2.48)           | <b>&lt;.0001</b> |
|        |                     | >=20 Gy vs 0      | 4.05 (3.04-5.39)           | <b>&lt;.0001</b> |
|        |                     | Unknown vs 0      | 1.54 (0.76-3.10)           | 0.23             |
|        | Alkylating agents   | 1st tertile vs 0  | 1.17 (0.82-1.68)           | 0.39             |
|        |                     | 2nd tertile vs 0  | 1.09 (0.80-1.49)           | 0.60             |
|        |                     | 3rd tertile vs 0  | 1.21 (0.92-1.58)           | 0.18             |
|        |                     | Unknown vs 0      | 1.11 (0.69-1.77)           | 0.67             |
|        | Anthracyclines      | 1st tertile vs 0  | 0.58 (0.38-0.90)           | <b>0.014</b>     |
|        |                     | 2nd tertile vs 0  | 0.68 (0.47-0.97)           | <b>0.034</b>     |
|        |                     | 3rd tertile vs 0  | 0.94 (0.69-1.29)           | 0.71             |
|        |                     | Unknown vs 0      | 0.60 (0.27-1.34)           | 0.21             |
|        | Epipodophyllotoxins | 1st tertile vs 0  | 0.69 (0.36-1.32)           | 0.26             |
|        |                     | 2nd tertile vs 0  | 0.57 (0.29-1.14)           | 0.11             |
|        |                     | 3rd tertile vs 0  | 0.58 (0.29-1.18)           | 0.13             |
|        |                     | Unknown vs 0      | 3.48 (1.52-7.96)           | <b>0.0032</b>    |

Abbreviations: HR, Hazard Ratio; CI, Confidence Interval; YRI, Yoruba population (African ancestry) in 1000 Genome Project; ASA, Eastern Asian population (Japanese and Chinese) in 1000 Genomes Project; SJLIFE, the St. Jude Lifetime Cohort Study; CCSS, the Childhood Cancer Survivor Study.

**Supplementary Table 14. Multivariable model of mortality risk in SJLIFE (adjusting for time from diagnosis to the first biospecimen collection).**

| Status                     | Variable                                              | Category          | HR (95% CI)      | P-value         | Including CPV in the model |                 |
|----------------------------|-------------------------------------------------------|-------------------|------------------|-----------------|----------------------------|-----------------|
|                            |                                                       |                   |                  |                 | HR (95% CI)                | P-value         |
| <b>All-cause mortality</b> | Age at diagnosis                                      | 5-9 vs 0-4        | 1.25(0.78-2.00)  | 0.36            | 1.37(0.85-2.21)            | 0.20            |
|                            |                                                       | 10-14 vs 0-4      | 2.09(1.33-3.26)  | 0.0013          | 2.30(1.46-3.64)            | 0.00040         |
|                            |                                                       | >=15 vs 0-4       | 3.13(1.99-4.93)  | <.0001          | 3.45(2.17-5.47)            | <.0001          |
|                            | YRI                                                   |                   | 1.00(0.58-1.75)  | 0.99            | 1.00(0.57-1.74)            | 0.99            |
|                            | ASA                                                   |                   | 0.32(0.01-18.50) | 0.58            | 0.31(0.01-18.65)           | 0.57            |
|                            | Sex                                                   | Male vs Female    | 1.67(1.21-2.30)  | 0.0017          | 1.65(1.20-2.27)            | 0.0021          |
|                            | Chest RT                                              | >0 to <20 Gy vs 0 | 2.22(1.39-3.55)  | 0.00080         | 2.18(1.36-3.49)            | 0.0011          |
|                            |                                                       | >=20 Gy vs 0      | 3.66(2.26-5.94)  | <.0001          | 3.81(2.35-6.16)            | <.0001          |
|                            | Alkylating agents                                     | 1st tertile vs 0  | 1.10(0.61-1.99)  | 0.76            | 1.08(0.59-1.95)            | 0.81            |
|                            |                                                       | 2nd tertile vs 0  | 1.65(1.02-2.67)  | 0.042           | 1.61(1.00-2.61)            | 0.052           |
|                            |                                                       | 3rd tertile vs 0  | 1.52(1.02-2.27)  | 0.041           | 1.46(0.98-2.19)            | 0.065           |
|                            | Anthracyclines (COG)                                  | 1st tertile vs 0  | 0.45(0.25-0.82)  | 0.0084          | 0.47(0.26-0.86)            | 0.013           |
|                            |                                                       | 2nd tertile vs 0  | 0.51(0.30-0.86)  | 0.011           | 0.52(0.31-0.89)            | 0.016           |
|                            |                                                       | 3rd tertile vs 0  | 0.56(0.34-0.92)  | 0.022           | 0.58(0.35-0.96)            | 0.033           |
|                            | Epipodophyllotoxins                                   | 1st tertile vs 0  | 1.04(0.53-2.04)  | 0.91            | 1.03(0.52-2.03)            | 0.93            |
|                            |                                                       | 2nd tertile vs 0  | 0.66(0.31-1.41)  | 0.29            | 0.67(0.31-1.41)            | 0.29            |
|                            |                                                       | 3rd tertile vs 0  | 0.65(0.32-1.32)  | 0.23            | 0.68(0.34-1.38)            | 0.29            |
|                            | Time from diagnosis to the first biospecimen          |                   | 1.08(0.99-1.17)  | 0.10            | 1.08(0.99-1.17)            | 0.11            |
|                            | Time from diagnosis to the first biospecimen (square) |                   | 1.00(1.00-1.00)  | 0.71            | 1.00(1.00-1.00)            | 0.76            |
|                            | CPV carriers                                          | Yes vs No         |                  | .               | 2.24(1.28-3.93)            | 0.004           |
|                            | <b>SMN-related mortality</b>                          | Age at diagnosis  | 5-9 vs 0-4       | 1.72(0.63-4.65) | 0.29                       | 2.19(0.82-5.87) |
| 10-14 vs 0-4               |                                                       |                   | 3.14(1.31-7.57)  | 0.011           | 4.11(1.72-9.80)            | 0.0015          |
| >=15 vs 0-4                |                                                       |                   | 5.48(2.28-13.12) | 0.0001          | 7.06(2.91-17.17)           | <.0001          |
| YRI                        |                                                       |                   | 1.01(0.36-2.87)  | 0.98            | 1.02(0.36-2.90)            | 0.97            |
| ASA                        |                                                       |                   | 1.13(0.10-13.26) | 0.92            | 1.09(0.08-15.30)           | 0.95            |
| Sex                        |                                                       | Male vs Female    | 1.70(0.92-3.13)  | 0.088           | 1.67(0.91-3.07)            | 0.10            |
| Chest RT                   |                                                       | >0 to <20 Gy vs 0 | 2.37(0.93-6.06)  | 0.070           | 2.40(0.96-5.97)            | 0.06            |
|                            |                                                       | >=20 Gy vs 0      | 2.22(0.85-5.81)  | 0.10            | 2.48(0.97-6.32)            | 0.06            |
| Alkylating agents          |                                                       | 1st tertile vs 0  | 0.96(0.25-3.75)  | 0.95            | 0.94(0.24-3.73)            | 0.93            |
|                            |                                                       | 2nd tertile vs 0  | 2.89(1.10-7.60)  | 0.032           | 2.80(1.07-7.29)            | 0.035           |
|                            |                                                       | 3rd tertile vs 0  | 2.22(1.05-4.71)  | 0.038           | 2.07(0.97-4.45)            | 0.061           |
| Anthracyclines (COG)       |                                                       | 1st tertile vs 0  | 0.45(0.12-1.64)  | 0.23            | 0.49(0.13-1.88)            | 0.30            |

| Status                       | Variable                                              | Category          | HR (95% CI)      | P-value | Including CPV in the model |         |
|------------------------------|-------------------------------------------------------|-------------------|------------------|---------|----------------------------|---------|
|                              |                                                       |                   |                  |         | HR (95% CI)                | P-value |
|                              |                                                       | 2nd tertile vs 0  | 0.30(0.10-0.91)  | 0.033   | 0.32(0.10-0.95)            | 0.040   |
|                              |                                                       | 3rd tertile vs 0  | 0.28(0.11-0.74)  | 0.0098  | 0.30(0.11-0.81)            | 0.018   |
|                              | Epipodophyllotoxins                                   | 1st tertile vs 0  | 0.83(0.18-3.85)  | 0.82    | 0.83(0.18-3.88)            | 0.82    |
|                              |                                                       | 2nd tertile vs 0  | 0.28(0.03-2.40)  | 0.25    | 0.27(0.03-2.38)            | 0.24    |
|                              |                                                       | 3rd tertile vs 0  | 0.19(0.03-1.10)  | 0.065   | 0.21(0.04-1.18)            | 0.077   |
|                              | Time from diagnosis to the first biospecimen          |                   | 1.21(1.01-1.43)  | 0.035   | 1.21(1.02-1.44)            | 0.033   |
|                              | Time from diagnosis to the first biospecimen (square) |                   | 1.00(0.99-1.00)  | 0.084   | 1.00(0.99-1.00)            | 0.087   |
|                              | CPV carriers                                          | Yes vs No         |                  | .       | 3.80(1.47-9.82)            | 0.0058  |
| <b>Other-cause mortality</b> | Age at diagnosis                                      | 5-9 vs 0-4        | 1.02(0.55-1.89)  | 0.95    | 1.05(0.57-1.95)            | 0.87    |
|                              |                                                       | 10-14 vs 0-4      | 1.81(1.01-3.23)  | 0.047   | 1.87(1.03-3.38)            | 0.039   |
|                              |                                                       | >=15 vs 0-4       | 2.22(1.16-4.23)  | 0.02    | 2.29(1.20-4.38)            | 0.012   |
|                              | YRI                                                   |                   | 1.11(0.53-2.29)  | 0.79    | 1.10(0.53-2.28)            | 0.79    |
|                              | ASA                                                   |                   | 0.30(0.00-44.20) | 0.64    | 0.29(0.00-46.01)           | 0.63    |
|                              | Sex                                                   | Male vs Female    | 1.92(1.23-2.99)  | 0.0039  | 1.91(1.23-2.98)            | 0.0042  |
|                              | Chest RT                                              | >0 to <20 Gy vs 0 | 1.96(1.07-3.59)  | 0.030   | 1.93(1.04-3.58)            | 0.036   |
|                              |                                                       | >=20 Gy vs 0      | 4.51(2.40-8.45)  | <.0001  | 4.55(2.44-8.51)            | <.0001  |
|                              | Alkylating agents                                     | 1st tertile vs 0  | 1.26(0.60-2.66)  | 0.54    | 1.25(0.60-2.64)            | 0.55    |
|                              |                                                       | 2nd tertile vs 0  | 1.30(0.67-2.51)  | 0.43    | 1.29(0.67-2.47)            | 0.45    |
|                              |                                                       | 3rd tertile vs 0  | 1.32(0.76-2.30)  | 0.32    | 1.31(0.75-2.28)            | 0.35    |
|                              | Anthracyclines (COG)                                  | 1st tertile vs 0  | 0.55(0.27-1.12)  | 0.099   | 0.56(0.28-1.14)            | 0.11    |
|                              |                                                       | 2nd tertile vs 0  | 0.53(0.26-1.08)  | 0.079   | 0.54(0.27-1.09)            | 0.085   |
|                              |                                                       | 3rd tertile vs 0  | 0.74(0.38-1.45)  | 0.37    | 0.75(0.38-1.47)            | 0.40    |
|                              | Epipodophyllotoxins                                   | 1st tertile vs 0  | 0.91(0.35-2.34)  | 0.84    | 0.91(0.35-2.32)            | 0.84    |
|                              |                                                       | 2nd tertile vs 0  | 1.08(0.48-2.44)  | 0.85    | 1.09(0.48-2.45)            | 0.84    |
|                              |                                                       | 3rd tertile vs 0  | 1.00(0.39-2.53)  | 1.00    | 1.02(0.40-2.60)            | 0.97    |
|                              | Time from diagnosis to the first biospecimen          |                   | 1.05(0.94-1.19)  | 0.39    | 1.05(0.94-1.19)            | 0.39    |
|                              | Time from diagnosis to the first biospecimen (square) |                   | 1.00(1.00-1.00)  | 0.80    | 1.00(1.00-1.00)            | 0.78    |
|                              | CPV carriers                                          | Yes vs No         |                  | .       | 1.45(0.61-3.49)            | 0.40    |

Abbreviations: SJLIFE, the St. Jude Lifetime Cohort Study; CPV, Cancer Predisposition Variants; HR, Hazard Ratio; CI, Confidence Interval; YRI, Yoruba population (African ancestry) in 1000 Genome Project; ASA, Eastern Asian population (Japanese and Chinese) in 1000 Genomes Project; RT, radiotherapy; SMN, Subsequent Malignant Neoplasm.



**Supplementary Table 15. Multivariable model of mortality risk in CCSS (adjusting for time from diagnosis to the first biospecimen collection).**

| Status                       | Variable                                              | Category          | HR (95% CI)     | P-value         | Including CPV in the model |         |
|------------------------------|-------------------------------------------------------|-------------------|-----------------|-----------------|----------------------------|---------|
|                              |                                                       |                   |                 |                 | HR (95% CI)                | P-value |
| <b>All-cause mortality</b>   | Age at diagnosis                                      | 5-9 vs 0-4        | 1.04(0.81-1.35) | 0.75            | 1.07(0.83-1.38)            | 0.62    |
|                              |                                                       | 10-14 vs 0-4      | 1.50(1.18-1.90) | 0.0009          | 1.53(1.20-1.94)            | 0.0005  |
|                              |                                                       | >=15 vs 0-4       | 2.09(1.66-2.64) | <.0001          | 2.15(1.70-2.71)            | <.0001  |
|                              | YRI                                                   |                   | 1.49(0.76-2.93) | 0.25            | 1.56(0.79-3.06)            | 0.20    |
|                              | ASA                                                   |                   | 0.49(0.15-1.60) | 0.23            | 0.49(0.15-1.62)            | 0.24    |
|                              | Sex                                                   | Male vs Female    | 1.04(0.88-1.22) | 0.66            | 1.04(0.88-1.22)            | 0.65    |
|                              | Chest RT                                              | >0 to <20 Gy vs 0 | 1.71(1.34-2.19) | <.0001          | 1.75(1.37-2.23)            | <.0001  |
|                              |                                                       | >=20 Gy vs 0      | 3.65(2.85-4.66) | <.0001          | 3.77(2.95-4.82)            | <.0001  |
|                              | Alkylating agents                                     | Unknown vs 0      | 1.56(0.97-2.49) | 0.065           | 1.63(1.02-2.60)            | 0.042   |
|                              |                                                       | 1st tertile vs 0  | 1.06(0.78-1.46) | 0.70            | 1.08(0.79-1.48)            | 0.64    |
|                              |                                                       | 2nd tertile vs 0  | 1.26(0.98-1.63) | 0.076           | 1.28(0.99-1.65)            | 0.064   |
|                              |                                                       | 3rd tertile vs 0  | 1.22(0.96-1.55) | 0.11            | 1.23(0.97-1.56)            | 0.093   |
|                              | Anthracyclines                                        | Unknown vs 0      | 1.14(0.83-1.57) | 0.42            | 1.14(0.83-1.58)            | 0.41    |
|                              |                                                       | 1st tertile vs 0  | 0.64(0.42-0.97) | 0.037           | 0.63(0.41-0.96)            | 0.033   |
|                              |                                                       | 2nd tertile vs 0  | 0.92(0.68-1.26) | 0.62            | 0.93(0.68-1.27)            | 0.64    |
|                              |                                                       | 3rd tertile vs 0  | 1.13(0.87-1.48) | 0.36            | 1.12(0.86-1.47)            | 0.39    |
|                              | Epipodophyllotoxins                                   | Unknown vs 0      | 1.09(0.68-1.75) | 0.73            | 1.09(0.68-1.76)            | 0.72    |
|                              |                                                       | 1st tertile vs 0  | 1.48(0.78-2.82) | 0.23            | 1.39(0.73-2.65)            | 0.31    |
|                              |                                                       | 2nd tertile vs 0  | 0.74(0.23-2.31) | 0.60            | 0.77(0.24-2.41)            | 0.65    |
|                              |                                                       | 3rd tertile vs 0  | 0.75(0.28-2.04) | 0.57            | 0.77(0.29-2.09)            | 0.61    |
|                              | Time from diagnosis to the first biospecimen          | Unknown vs 0      | 1.44(0.82-2.55) | 0.21            | 1.37(0.78-2.42)            | 0.28    |
|                              |                                                       |                   | 0.98(0.89-1.09) | 0.73            | 0.99(0.89-1.09)            | 0.79    |
|                              | Time from diagnosis to the first biospecimen (square) |                   | 1.00(1.00-1.00) | 0.073           | 1.00(1.00-1.00)            | 0.084   |
| CPV carriers                 | Yes vs NO                                             |                   | .               | 2.53(1.86-3.45) | <.0001                     |         |
| <b>SMN-related mortality</b> | Age at diagnosis                                      | 5-9 vs 0-4        | 1.10(0.68-1.77) | 0.71            | 1.13(0.70-1.83)            | 0.61    |
|                              |                                                       | 10-14 vs 0-4      | 1.95(1.28-2.99) | 0.0019          | 1.99(1.30-3.05)            | 0.0015  |
|                              |                                                       | >=15 vs 0-4       | 3.34(2.22-5.03) | <.0001          | 3.47(2.31-5.21)            | <.0001  |
|                              | YRI                                                   |                   | 0.92(0.23-3.70) | 0.90            | 0.98(0.24-3.96)            | 0.97    |
|                              | ASA                                                   |                   | 0.72(0.23-2.19) | 0.56            | 0.67(0.20-2.25)            | 0.51    |
|                              | Sex                                                   | Male vs Female    | 0.90(0.69-1.18) | 0.45            | 0.89(0.68-1.17)            | 0.42    |
|                              | Chest RT                                              | >0 to <20 Gy vs 0 | 2.10(1.36-3.24) | 0.0008          | 2.16(1.40-3.34)            | 0.0005  |
|                              |                                                       | >=20 Gy vs 0      | 4.09(2.67-6.26) | <.0001          | 4.34(2.84-6.64)            | <.0001  |

| Status                       | Variable                                              | Category          | HR (95% CI)     | P-value | Including CPV in the model |         |
|------------------------------|-------------------------------------------------------|-------------------|-----------------|---------|----------------------------|---------|
|                              |                                                       |                   |                 |         | HR (95% CI)                | P-value |
|                              |                                                       | Unknown vs 0      | 3.52(1.76-7.04) | 0.0004  | 3.64(1.85-7.18)            | 0.0002  |
|                              | Alkylating agents                                     | 1st tertile vs 0  | 1.07(0.64-1.81) | 0.79    | 1.10(0.65-1.86)            | 0.72    |
|                              |                                                       | 2nd tertile vs 0  | 1.68(1.14-2.48) | 0.0093  | 1.68(1.13-2.49)            | 0.011   |
|                              |                                                       | 3rd tertile vs 0  | 1.45(0.97-2.15) | 0.068   | 1.47(0.99-2.18)            | 0.058   |
|                              |                                                       | Unknown vs 0      | 1.59(1.03-2.46) | 0.037   | 1.59(1.03-2.48)            | 0.039   |
|                              | Anthracyclines                                        | 1st tertile vs 0  | 0.50(0.24-1.04) | 0.063   | 0.50(0.24-1.05)            | 0.067   |
|                              |                                                       | 2nd tertile vs 0  | 0.87(0.54-1.39) | 0.55    | 0.88(0.55-1.42)            | 0.61    |
|                              |                                                       | 3rd tertile vs 0  | 1.01(0.66-1.53) | 0.97    | 1.01(0.67-1.54)            | 0.95    |
|                              |                                                       | Unknown vs 0      | 1.15(0.55-2.42) | 0.71    | 1.14(0.54-2.42)            | 0.73    |
|                              | Epipodophyllotoxins                                   | 1st tertile vs 0  | 2.01(0.79-5.12) | 0.14    | 1.72(0.68-4.31)            | 0.25    |
|                              |                                                       | 2nd tertile vs 0  | 0.67(0.09-4.89) | 0.69    | 0.71(0.10-5.22)            | 0.74    |
|                              |                                                       | 3rd tertile vs 0  | 1.13(0.27-4.65) | 0.87    | 1.18(0.29-4.84)            | 0.82    |
|                              |                                                       | Unknown vs 0      | 0.38(0.13-1.10) | 0.075   | 0.36(0.13-1.00)            | 0.050   |
|                              | Time from diagnosis to the first biospecimen          |                   | 0.96(0.81-1.13) | 0.62    | 0.96(0.82-1.14)            | 0.65    |
|                              | Time from diagnosis to the first biospecimen (square) |                   | 1.00(1.00-1.00) | 0.17    | 1.00(1.00-1.00)            | 0.18    |
|                              | CPV carriers                                          | Yes vs NO         |                 | .       | 3.73(2.37-5.88)            | <.0001  |
| <b>Other-cause mortality</b> | Age at diagnosis                                      | 5-9 vs 0-4        | 1.02(0.73-1.42) | 0.91    | 1.03(0.74-1.44)            | 0.85    |
|                              |                                                       | 10-14 vs 0-4      | 1.26(0.92-1.74) | 0.15    | 1.28(0.93-1.76)            | 0.13    |
|                              |                                                       | >=15 vs 0-4       | 1.43(1.04-1.95) | 0.027   | 1.44(1.06-1.97)            | 0.022   |
|                              | YRI                                                   |                   | 1.88(0.85-4.16) | 0.12    | 1.93(0.87-4.26)            | 0.11    |
|                              | ASA                                                   |                   | 0.41(0.07-2.21) | 0.30    | 0.40(0.07-2.24)            | 0.30    |
|                              | Sex                                                   | Male vs Female    | 1.21(0.98-1.51) | 0.081   | 1.22(0.98-1.51)            | 0.077   |
|                              | Chest RT                                              | >0 to <20 Gy vs 0 | 1.50(1.09-2.08) | 0.013   | 1.52(1.10-2.10)            | 0.012   |
|                              |                                                       | >=20 Gy vs 0      | 3.43(2.51-4.69) | <.0001  | 3.49(2.56-4.77)            | <.0001  |
|                              | Alkylating agents                                     | Unknown vs 0      | 1.03(0.52-2.05) | 0.93    | 1.05(0.53-2.07)            | 0.90    |
|                              |                                                       | 1st tertile vs 0  | 1.09(0.72-1.65) | 0.70    | 1.09(0.72-1.66)            | 0.67    |
|                              |                                                       | 2nd tertile vs 0  | 1.02(0.71-1.46) | 0.94    | 1.02(0.71-1.47)            | 0.91    |
|                              |                                                       | 3rd tertile vs 0  | 0.99(0.71-1.38) | 0.96    | 1.00(0.71-1.39)            | 0.98    |
|                              | Anthracyclines                                        | Unknown vs 0      | 0.91(0.56-1.48) | 0.71    | 0.91(0.56-1.49)            | 0.71    |
|                              |                                                       | 1st tertile vs 0  | 0.73(0.42-1.27) | 0.26    | 0.72(0.42-1.26)            | 0.25    |
|                              |                                                       | 2nd tertile vs 0  | 1.01(0.66-1.56) | 0.95    | 1.01(0.66-1.56)            | 0.95    |
|                              |                                                       | 3rd tertile vs 0  | 1.21(0.84-1.75) | 0.31    | 1.21(0.84-1.75)            | 0.32    |
|                              |                                                       | Unknown vs 0      | 0.85(0.40-1.79) | 0.66    | 0.85(0.40-1.81)            | 0.67    |

| Status | Variable                                              | Category         | HR (95% CI)     | P-value | Including CPV in the model |         |
|--------|-------------------------------------------------------|------------------|-----------------|---------|----------------------------|---------|
|        |                                                       |                  |                 |         | HR (95% CI)                | P-value |
|        | Epipodophyllotoxins                                   | 1st tertile vs 0 | 1.26(0.52-3.08) | 0.61    | 1.23(0.51-3.01)            | 0.64    |
|        |                                                       | 2nd tertile vs 0 | 0.84(0.20-3.49) | 0.81    | 0.86(0.21-3.58)            | 0.84    |
|        |                                                       | 3rd tertile vs 0 | 0.33(0.05-2.39) | 0.27    | 0.34(0.05-2.42)            | 0.28    |
|        |                                                       | Unknown vs 0     | 3.42(1.48-7.87) | 0.0039  | 3.35(1.45-7.76)            | 0.0047  |
|        | Time from diagnosis to the first biospecimen          |                  | 1.03(0.89-1.18) | 0.74    | 1.03(0.89-1.18)            | 0.70    |
|        | Time from diagnosis to the first biospecimen (square) |                  | 1.00(1.00-1.00) | 0.59    | 1.00(1.00-1.00)            | 0.62    |
|        | CPV carriers                                          | Yes vs No        |                 | .       | 1.80(1.14-2.84)            | 0.012   |

Abbreviations: CCSS, the Childhood Cancer Survivor Study; CPV, Cancer Predisposition Variants; HR, Hazard Ratio; CI, Confidence Interval; YRI, Yoruba population (African ancestry) in 1000 Genome Project; ASA, Eastern Asian population (Japanese and Chinese) in 1000 Genomes Project; RT, radiotherapy; SMN, Subsequent Malignant Neoplasm.

**Supplementary Table 16. Multivariable cause-specific Cox model in SJLIFE**

| Status                     | Variable                     | Category         | csHR (95% CI)     | P-value          | Including CPV in the model |                  |        |
|----------------------------|------------------------------|------------------|-------------------|------------------|----------------------------|------------------|--------|
|                            |                              |                  |                   |                  | csHR (95% CI)              | P-value          |        |
| <b>All-cause mortality</b> | Age at diagnosis             | 5-9              | 1.12 (0.70-1.80)  | 0.63             | 1.21 (0.75-1.96)           | 0.43             |        |
|                            | Age at diagnosis             | 10-14            | 1.63 (1.05-2.54)  | 0.030            | 1.76 (1.12-2.76)           | 0.014            |        |
|                            | Age at diagnosis             | >=15             | 2.38 (1.52-3.73)  | 0.0002           | 2.58 (1.63-4.08)           | <.0001           |        |
|                            | YRI                          |                  | 0.87 (0.50-1.52)  | 0.63             | 0.88 (0.50-1.53)           | 0.64             |        |
|                            | ASA                          |                  | 0.12 (0.00-8.72)  | 0.33             | 0.11 (0.00-8.55)           | 0.32             |        |
|                            | Sex                          | Male             | 1.62 (1.18-2.23)  | 0.0029           | 1.62 (1.18-2.23)           | 0.0030           |        |
|                            | Chest RT                     | >0 to <20        | 2.87 (1.81-4.54)  | <.0001           | 2.83 (1.79-4.48)           | <.0001           |        |
|                            | Chest RT                     | >=20             | 3.97 (2.43-6.48)  | <.0001           | 4.07 (2.49-6.65)           | <.0001           |        |
|                            | Alkylating agents            | 1st tertile      | 1.49 (0.82-2.71)  | 0.19             | 1.49 (0.82-2.71)           | 0.19             |        |
|                            | Alkylating agents            | 2nd tertile      | 2.14 (1.32-3.48)  | 0.0022           | 2.14 (1.31-3.48)           | 0.0023           |        |
|                            | Alkylating agents            | 3rd tertile      | 2.01 (1.36-2.99)  | 0.0005           | 2.00 (1.35-2.97)           | 0.0006           |        |
|                            | Anthracyclines (COG)         | 1st tertile      | 0.45 (0.24-0.83)  | 0.010            | 0.47 (0.25-0.86)           | 0.015            |        |
|                            | Anthracyclines (COG)         | 2nd tertile      | 0.37 (0.22-0.62)  | 0.0002           | 0.38 (0.22-0.63)           | 0.0002           |        |
|                            | Anthracyclines (COG)         | 3rd tertile      | 0.48 (0.29-0.78)  | 0.0030           | 0.49 (0.30-0.80)           | 0.0042           |        |
|                            | Epipodophyllotoxins          | 1st tertile      | 0.72 (0.37-1.40)  | 0.33             | 0.71 (0.37-1.38)           | 0.32             |        |
|                            | Epipodophyllotoxins          | 2nd tertile      | 0.43 (0.21-0.90)  | 0.024            | 0.43 (0.21-0.89)           | 0.024            |        |
|                            | Epipodophyllotoxins          | 3rd tertile      | 0.42 (0.21-0.83)  | 0.013            | 0.43 (0.22-0.86)           | 0.016            |        |
|                            | CPV carriers                 | Yes              |                   |                  | 1.89 (1.08-3.30)           | 0.025            |        |
|                            | <b>SMN-related mortality</b> | Age at diagnosis | 5-9               | 1.53 (0.58-4.09) | 0.39                       | 1.89 (0.72-4.94) | 0.19   |
|                            |                              | Age at diagnosis | 10-14             | 2.66 (1.11-6.40) | 0.029                      | 3.30 (1.38-7.89) | 0.0072 |
| Age at diagnosis           |                              | >=15             | 4.67 (1.98-11.03) | 0.0004           | 5.79 (2.45-13.69)          | <.0001           |        |
| YRI                        |                              |                  | 0.89 (0.32-2.51)  | 0.83             | 0.92 (0.33-2.58)           | 0.88             |        |
| ASA                        |                              |                  | 0.50 (0.03-8.01)  | 0.62             | 0.48 (0.03-8.71)           | 0.62             |        |
| Sex                        |                              | Male             | 1.66 (0.90-3.06)  | 0.10             | 1.66 (0.91-3.05)           | 0.099            |        |
| Chest RT                   |                              | >0 to <20        | 2.62 (1.06-6.45)  | 0.037            | 2.61 (1.08-6.33)           | 0.034            |        |
| Chest RT                   |                              | >=20             | 2.45 (0.91-6.62)  | 0.078            | 2.67 (1.01-7.07)           | 0.049            |        |
| Alkylating agents          |                              | 1st tertile      | 1.30 (0.31-5.47)  | 0.728            | 1.33 (0.31-5.69)           | 0.70             |        |
| Alkylating agents          |                              | 2nd tertile      | 3.52(1.34-9.28)   | 0.011            | 3.59 (1.36-9.50)           | 0.010            |        |
| Alkylating agents          |                              | 3rd tertile      | 2.74(1.23-6.12)   | 0.014            | 2.74 (1.24-6.03)           | 0.013            |        |
| Anthracyclines (COG)       |                              | 1st tertile      | 0.43(0.11-1.74)   | 0.24             | 0.47 (0.11-2.02)           | 0.31             |        |
| Anthracyclines (COG)       |                              | 2nd tertile      | 0.24 (0.08-0.75)  | 0.0144           | 0.24 (0.08-0.78)           | 0.017            |        |
| Anthracyclines (COG)       |                              | 3rd tertile      | 0.28 (0.10-0.74)  | 0.011            | 0.29 (0.11-0.80)           | 0.016            |        |
| Epipodophyllotoxins        |                              | 1st tertile      | 0.62 (0.14-2.73)  | 0.52             | 0.61 (0.14-2.77)           | 0.52             |        |
| Epipodophyllotoxins        |                              | 2nd tertile      | 0.20(0.02-1.69)   | 0.14             | 0.20 (0.02-1.66)           | 0.14             |        |

|                              |                      |              |                   |        |                   |                  |
|------------------------------|----------------------|--------------|-------------------|--------|-------------------|------------------|
|                              | Epipodophyllotoxins  | 3rd tertile  | 0.17 (0.03-0.97)  | 0.046  | 0.18 (0.03-1.02)  | 0.053            |
|                              | CPV carriers         | Yes          |                   |        | 3.36 (1.36-8.32)  | 0.0087           |
| <b>Other-cause mortality</b> | Age at diagnosis     | 5-9          | 0.91 (0.49-1.68)  | 0.76   | 0.92 (0.50-1.71)  | 0.80             |
|                              | Age at diagnosis     | 10-14        | 1.39 (0.78-2.48)  | 0.26   | 1.41 (0.79-2.54)  | 0.25             |
|                              | Age at diagnosis     | >=15         | 1.66 (0.87-3.16)  | 0.12   | 1.69 (0.88-3.22)  | 0.11             |
|                              | YRI                  |              | 0.96 (0.47-1.96)  | 0.90   | 0.96 (0.47-1.96)  | 0.90             |
|                              | ASA                  |              | 0.08 (0.00-31.13) | 0.41   | 0.08 (0.00-31.34) | 0.41             |
|                              | Sex                  | Male         | 1.90 (1.22-2.96)  | 0.0043 | 1.90 (1.22-2.96)  | 0.0043           |
|                              | Chest RT             | >0 to <20    | 2.73 (1.46-5.10)  | 0.0016 | 2.72 (1.45-5.10)  | 0.0019           |
|                              | Chest RT             | >=20         | 5.17 (2.62-10.21) | <.0001 | 5.19 (2.64-10.21) | <.0001           |
|                              | Alkylating agents    | 1st tertile  | 1.74 (0.82-3.69)  | 0.15   | 1.74 (0.82-3.69)  | 0.15             |
|                              | Alkylating agents    | 2nd tertile  | 1.78 (0.88-3.59)  | 0.11   | 1.77 (0.88-3.59)  | 0.11             |
|                              | Alkylating agents    | 3rd tertile  | 1.83 (1.06-3.18)  | 0.031  | 1.83 (1.06-3.17)  | 0.031            |
|                              | Anthracyclines (COG) | 1st tertile  | 0.54 (0.26-1.14)  | 0.11   | 0.55 (0.26-1.15)  | 0.11             |
|                              | Anthracyclines (COG) | 2nd tertile  | 0.36 (0.17-0.74)  | 0.0052 | 0.36 (0.17-0.74)  | 0.0054           |
|                              | Anthracyclines (COG) | 3rd tertile  | 0.59 (0.31-1.14)  | 0.11   | 0.59 (0.31-1.15)  | 0.12             |
|                              | Epipodophyllotoxins  | 1st tertile  | 0.57 (0.23-1.42)  | 0.23   | 0.57 (0.23-1.42)  | 0.23             |
|                              | Epipodophyllotoxins  | 2nd tertile  | 0.63 (0.29-1.40)  | 0.26   | 0.63 (0.29-1.40)  | 0.26             |
|                              | Epipodophyllotoxins  | 3rd tertile  | 0.55 (0.22-1.39)  | 0.21   | 0.56 (0.22-1.41)  | 0.22             |
|                              |                      | CPV carriers | Yes               |        |                   | 1.19 (0.50-2.85) |

Abbreviations: SJLIFE, the St. Jude Lifetime Cohort Study; CPV, Cancer Predisposition Variants; csHR, cause-specific Hazard Ratio; CI, Confidence Interval; YRI, Yoruba population (African ancestry) in 1000 Genome Project; ASA, Eastern Asian population (Japanese and Chinese) in 1000 Genomes Project; RT, radiotherapy; SMN, Subsequent Malignant Neoplasm.

**Supplementary Table 17. Multivariable cause-specific Cox model in CCSS.**

| Status                     | Variable                     | Category         | csHR (95% CI)    | P-value          | Including CPV in the model |                  |
|----------------------------|------------------------------|------------------|------------------|------------------|----------------------------|------------------|
|                            |                              |                  |                  |                  | csHR (95% CI)              | P-value          |
| <b>All-cause mortality</b> | Age at diagnosis             | 5-9              | 1.07 (0.83-1.38) | 0.63             | 1.08 (0.84-1.40)           | 0.54             |
|                            | Age at diagnosis             | 10-14            | 1.51 (1.19-1.92) | 0.0007           | 1.54 (1.21-1.96)           | 0.0004           |
|                            | Age at diagnosis             | >=15             | 2.13 (1.68-2.69) | <.0001           | 2.18 (1.72-2.75)           | <.0001           |
|                            | YRI                          |                  | 1.36 (0.69-2.67) | 0.38             | 1.41 (0.72-2.78)           | 0.32             |
|                            | ASA                          |                  | 0.45 (0.14-1.48) | 0.19             | 0.46 (0.14-1.52)           | 0.20             |
|                            | Sex                          | Male             | 1.02 (0.87-1.20) | 0.78             | 1.03 (0.87-1.21)           | 0.77             |
|                            | Chest RT                     | >0 to <20        | 1.83 (1.44-2.34) | <.0001           | 1.86 (1.46-2.37)           | <.0001           |
|                            | Chest RT                     | >=20             | 3.89 (3.04-4.98) | <.0001           | 4.02 (3.14-5.14)           | <.0001           |
|                            | Chest RT                     | Unknown          | 1.57 (0.97-2.52) | 0.064            | 1.61 (1.00-2.59)           | 0.049            |
|                            | Alkylating agents            | 1st tertile      | 1.04 (0.76-1.42) | 0.82             | 1.04 (0.76-1.43)           | 0.79             |
|                            | Alkylating agents            | 2nd tertile      | 1.21 (0.94-1.57) | 0.15             | 1.22 (0.95-1.58)           | 0.13             |
|                            | Alkylating agents            | 3rd tertile      | 1.20 (0.94-1.53) | 0.14             | 1.21 (0.95-1.54)           | 0.12             |
|                            | Alkylating agents            | Unknown          | 1.16 (0.84-1.60) | 0.36             | 1.16 (0.84-1.60)           | 0.37             |
|                            | Anthracyclines               | 1st tertile      | 0.51 (0.34-0.78) | 0.0020           | 0.51 (0.33-0.78)           | 0.0017           |
|                            | Anthracyclines               | 2nd tertile      | 0.79 (0.58-1.07) | 0.13             | 0.79 (0.58-1.08)           | 0.14             |
|                            | Anthracyclines               | 3rd tertile      | 1.00 (0.76-1.30) | 0.97             | 0.99 (0.76-1.29)           | 0.94             |
|                            | Anthracyclines               | Unknown          | 0.99 (0.61-1.59) | 0.96             | 1.00 (0.62-1.61)           | 0.98             |
|                            | Epipodophyllotoxins          | 1st tertile      | 1.22 (0.64-2.30) | 0.55             | 1.14 (0.60-2.15)           | 0.70             |
|                            | Epipodophyllotoxins          | 2nd tertile      | 0.60 (0.19-1.88) | 0.38             | 0.62 (0.20-1.95)           | 0.42             |
|                            | Epipodophyllotoxins          | 3rd tertile      | 0.66 (0.25-1.79) | 0.41             | 0.68 (0.25-1.82)           | 0.44             |
|                            | Epipodophyllotoxins          | Unknown          | 1.52 (0.86-2.67) | 0.15             | 1.45 (0.83-2.55)           | 0.20             |
|                            | CPV carriers                 | Yes              |                  |                  | 2.45 (1.80-3.33)           | <.0001           |
|                            | <b>SMN-related mortality</b> | Age at diagnosis | 5-9              | 1.10 (0.68-1.78) | 0.69                       | 1.12 (0.70-1.81) |
| Age at diagnosis           |                              | 10-14            | 1.98 (1.29-3.02) | 0.0016           | 2.03 (1.33-3.10)           | 0.0011           |
| Age at diagnosis           |                              | >=15             | 3.47 (2.30-5.22) | <.0001           | 3.58 (2.39-5.37)           | <.0001           |
| YRI                        |                              |                  | 0.88 (0.21-3.65) | 0.86             | 0.94 (0.22-3.90)           | 0.93             |
| ASA                        |                              |                  | 0.68 (0.23-2.05) | 0.50             | 0.71 (0.23-2.18)           | 0.55             |
| Sex                        |                              | Male             | 0.89 (0.68-1.17) | 0.41             | 0.89 (0.68-1.17)           | 0.39             |
| Chest RT                   |                              | >0 to <20        | 2.21 (1.48-3.41) | 0.0004           | 2.26 (1.46-3.49)           | 0.0002           |
| Chest RT                   |                              | >=20             | 4.56 (2.96-7.01) | <.0001           | 4.85 (3.16-7.44)           | <.0001           |
| Chest RT                   |                              | Unknown          | 3.51 (1.71-7.17) | 0.0006           | 3.57 (1.77-7.19)           | 0.0004           |
| Alkylating agents          |                              | 1st tertile      | 1.05 (0.62-1.77) | 0.87             | 1.06 (0.63-1.80)           | 0.83             |
| Alkylating agents          |                              | 2nd tertile      | 1.59 (1.08-2.35) | 0.020            | 1.61 (1.09-2.39)           | 0.018            |
| Alkylating agents          |                              | 3rd tertile      | 1.42 (0.95-2.11) | 0.085            | 1.44 (0.97-2.15)           | 0.072            |

| Status                       | Variable            | Category    | csHR (95% CI)    | P-value | Including CPV in the model |         |
|------------------------------|---------------------|-------------|------------------|---------|----------------------------|---------|
|                              |                     |             |                  |         | csHR (95% CI)              | P-value |
|                              | Alkylating agents   | Unknown     | 1.56 (1.00-2.44) | 0.051   | 1.54 (0.98-2.43)           | 0.062   |
|                              | Anthracyclines      | 1st tertile | 0.40 (0.19-0.83) | 0.014   | 0.40 (0.19-0.83)           | 0.014   |
|                              | Anthracyclines      | 2nd tertile | 0.74 (0.46-1.17) | 0.19    | 0.75 (0.47-1.20)           | 0.23    |
|                              | Anthracyclines      | 3rd tertile | 0.88 (0.58-1.34) | 0.55    | 0.88 (0.58-1.35)           | 0.57    |
|                              | Anthracyclines      | Unknown     | 1.00 (0.48-2.10) | 1.00    | 1.00 (0.47-2.12)           | 0.99    |
|                              | Epipodophyllotoxins | 1st tertile | 1.66 (0.66-4.14) | 0.28    | 1.38 (0.56-3.42)           | 0.48    |
|                              | Epipodophyllotoxins | 2nd tertile | 0.56 (0.08-4.08) | 0.57    | 0.60 (0.08-4.33)           | 0.61    |
|                              | Epipodophyllotoxins | 3rd tertile | 0.99 (0.24-4.07) | 0.99    | 1.02 (0.25-4.21)           | 0.97    |
|                              | Epipodophyllotoxins | Unknown     | 0.45 (0.15-1.33) | 0.15    | 0.44 (0.16-1.23)           | 0.12    |
|                              | CPV carriers        | Yes         |                  |         | 3.71 (2.34-5.86)           | <.0001  |
| <b>Other-cause mortality</b> | Age at diagnosis    | 5-9         | 1.04 (0.74-1.44) | 0.83    | 1.05 (0.75-1.46)           | 0.78    |
|                              | Age at diagnosis    | 10-14       | 1.29 (0.94-1.77) | 0.12    | 1.31 (0.95-1.80)           | 1.00    |
|                              | Age at diagnosis    | >=15        | 1.53 (1.12-2.09) | 0.0080  | 1.55 (1.14-2.12)           | 0.0059  |
|                              | YRI                 |             | 1.69 (0.76-3.79) | 0.20    | 1.73 (0.77-3.89)           | 0.18    |
|                              | ASA                 |             | 0.39 (0.07-2.03) | 0.26    | 0.39 (0.07-2.06)           | 0.27    |
|                              | Sex                 | Male        | 1.18 (0.95-1.47) | 0.14    | 1.18 (0.95-1.47)           | 0.14    |
|                              | Chest RT            | >0 to <20   | 1.64 (1.19-2.26) | 0.0026  | 1.66 (1.20-2.29)           | 0.0022  |
|                              | Chest RT            | >=20        | 3.88 (2.84-5.32) | <.0001  | 3.95 (2.89-5.40)           | <.0001  |
|                              | Chest RT            | Unknown     | 1.05 (0.52-2.12) | 0.90    | 1.06 (0.52-2.15)           | 0.87    |
|                              | Alkylating agents   | 1st tertile | 1.07 (0.70-1.63) | 0.75    | 1.07 (0.71-1.64)           | 0.74    |
|                              | Alkylating agents   | 2nd tertile | 1.00 (0.69-1.44) | 0.99    | 1.00 (0.70-1.45)           | 0.98    |
|                              | Alkylating agents   | 3rd tertile | 0.99 (0.71-1.39) | 0.97    | 1.00 (0.72-1.40)           | 0.99    |
|                              | Alkylating agents   | Unknown     | 0.94 (0.59-1.52) | 0.81    | 0.94 (0.58-1.52)           | 0.80    |
|                              | Anthracyclines      | 1st tertile | 0.59 (0.34-1.01) | 0.056   | 0.58 (0.34-1.01)           | 0.05    |
|                              | Anthracyclines      | 2nd tertile | 0.86 (0.57-1.32) | 0.50    | 0.87 (0.57-1.32)           | 0.50    |
|                              | Anthracyclines      | 3rd tertile | 1.07 (0.74-1.54) | 0.72    | 1.07 (0.74-1.54)           | 0.74    |
|                              | Anthracyclines      | Unknown     | 0.81 (0.39-1.66) | 0.56    | 0.81 (0.39-1.68)           | 0.57    |
|                              | Epipodophyllotoxins | 1st tertile | 1.10 (0.45-2.70) | 0.83    | 1.07 (0.43-2.62)           | 0.89    |
|                              | Epipodophyllotoxins | 2nd tertile | 0.72 (0.17-2.96) | 0.65    | 0.73 (0.18-3.04)           | 0.67    |
|                              | Epipodophyllotoxins | 3rd tertile | 0.30 (0.04-2.16) | 0.23    | 0.30 (0.04-2.18)           | 0.23    |
|                              | Epipodophyllotoxins | Unknown     | 3.49 (1.59-7.70) | 0.0019  | 3.42 (1.55-7.54)           | 0.0024  |
|                              | CPV carriers        | Yes         |                  |         | 1.85 (1.16-2.92)           | 0.0091  |

Abbreviations: CCSS, the Childhood Cancer Survivor Study; CPV, Cancer Predisposition Variants; csHR, cause-specific Hazard Ratio; CI, Confidence Interval; YRI, Yoruba population (African ancestry) in 1000 Genome Project; ASA, Eastern Asian population (Japanese and Chinese) in 1000 Genomes Project; RT, radiotherapy; SMN, Subsequent Malignant Neoplasm.

**Supplementary Table 18. Multivariable analyses in SJLIFE adjusting for the overall RT and chemotherapy (y/n).**

| Status                       | Variable                                               | Category | HR (95% CI)       | P-value | Including CPV in the model |         |
|------------------------------|--------------------------------------------------------|----------|-------------------|---------|----------------------------|---------|
|                              |                                                        |          |                   |         | subHR (95% CI)             | P-value |
| <b>All-cause mortality</b>   | Age at diagnosis                                       | 5-9      | 1.24 (0.78-1.96)  | 0.36    | 1.32 (0.83-2.10)           | 0.24    |
|                              | Age at diagnosis                                       | 10-14    | 1.83 (1.20-2.79)  | 0.0050  | 1.96 (1.28-3.00)           | 0.0020  |
|                              | Age at diagnosis                                       | >=15     | 2.56 (1.68-3.88)  | <.0001  | 2.75 (1.80-4.19)           | <.0001  |
|                              | YRI                                                    |          | 0.93 (0.53-1.62)  | 0.79    | 0.92 (0.53-1.60)           | 0.76    |
|                              | ASA                                                    |          | 0.08 (0.00-6.58)  | 0.26    | 0.08 (0.00-6.55)           | 0.26    |
|                              | Sex                                                    | Male     | 1.57 (1.15-2.15)  | 0.0049  | 1.57 (1.15-2.16)           | 0.0048  |
|                              | Cranial /Abdomen /Pelvis /Chest /Neck RT               | Yes      | 3.91 (2.58-5.92)  | <.0001  | 3.90 (2.58-5.90)           | <.0001  |
|                              | Alkylating agents /Anthracyclines /Epipodophyllotoxins | Yes      | 1.12 (0.76-1.65)  | 0.57    | 1.15 (0.78-1.70)           | 0.48    |
|                              | CPV carriers                                           | Yes      |                   |         | 2.05 (1.19-3.52)           | 0.0096  |
| <b>SMN-related mortality</b> | Age at diagnosis                                       | 5-9      | 1.61 (0.60-4.30)  | 0.34    | 1.87 (0.73-4.83)           | 0.19    |
|                              | Age at diagnosis                                       | 10-14    | 2.71 (1.13-6.50)  | 0.025   | 3.18 (1.38-7.31)           | 0.0065  |
|                              | Age at diagnosis                                       | >=15     | 4.32 (1.80-10.34) | 0.0010  | 5.11 (2.19-11.94)          | 0.0002  |
|                              | YRI                                                    |          | 1.01 (0.36-2.83)  | 0.99    | 0.98 (0.34-2.80)           | 0.97    |
|                              | ASA                                                    |          | 0.36 (0.02-6.02)  | 0.48    | 0.38 (0.02-6.45)           | 0.50    |
|                              | Sex                                                    | Male     | 1.59 (0.86-2.95)  | 0.14    | 1.60 (0.87-2.97)           | 0.13    |
|                              | Cranial /Abdomen /Pelvis /Chest /Neck RT               | Yes      | 3.39 (1.53-7.54)  | 0.0027  | 3.45 (1.58-7.53)           | 0.0019  |
|                              | Alkylating agents /Anthracyclines /Epipodophyllotoxins | Yes      | 1.05 (0.52-2.15)  | 0.89    | 1.12 (0.54-2.33)           | 0.76    |
|                              | CPV carriers                                           | Yes      |                   |         | 3.69 (1.57-8.69)           | 0.0028  |
| <b>Other-cause mortality</b> | Age at diagnosis                                       | 5-9      | 1.05 (0.58-1.88)  | 0.88    | 1.06 (0.59-1.92)           | 0.84    |
|                              | Age at diagnosis                                       | 10-14    | 1.61 (0.95-2.73)  | 0.076   | 1.64 (0.96-2.80)           | 0.071   |
|                              | Age at diagnosis                                       | >=15     | 1.87 (1.07-3.27)  | 0.028   | 1.90 (1.09-3.33)           | 0.024   |
|                              | YRI                                                    |          | 1.00 (0.48-2.07)  | 0.99    | 0.99 (0.48-2.06)           | 0.99    |
|                              | ASA                                                    |          | 0.07 (0.00-27.27) | 0.38    | 0.07 (0.00-27.58)          | 0.38    |
|                              | Sex                                                    | Male     | 1.85 (1.21-2.82)  | 0.0046  | 1.85 (1.21-2.82)           | 0.0046  |
|                              | Cranial /Abdomen /Pelvis /Chest /Neck RT               | Yes      | 3.97 (2.30-6.85)  | <.0001  | 3.96 (2.29-6.85)           | <.0001  |
|                              | Alkylating agents /Anthracyclines /Epipodophyllotoxins | Yes      | 1.21 (0.72-2.03)  | 0.48    | 1.22 (0.72-2.04)           | 0.46    |
|                              | CPV carriers                                           | Yes      |                   |         | 1.24 (0.54-2.86)           | 0.62    |

Abbreviations: SJLIFE, the St. Jude Lifetime Cohort Study; CPV, Cancer Predisposition Variants; subHR, subdistribution Hazard Ratio; CI, Confidence Interval; YRI, Yoruba population (African ancestry) in 1000 Genome Project; ASA, Eastern Asian population (Japanese and Chinese) in 1000 Genomes Project; RT, radiotherapy; SMN, Subsequent Malignant Neoplasm.



**Supplementary Table 19. Multivariable analyses in CCSS adjusting for the overall RT and chemotherapy (y/n).**

| Status                       | Variable                                               | Category | HR (95% CI)      | P-value | Including CPV in the model |         |
|------------------------------|--------------------------------------------------------|----------|------------------|---------|----------------------------|---------|
|                              |                                                        |          |                  |         | subHR (95% CI)             | P-value |
| <b>All-cause mortality</b>   | Age at diagnosis                                       | 5-9      | 1.18 (0.90-1.56) | 0.24    | 1.19 (0.91-1.57)           | 0.21    |
|                              | Age at diagnosis                                       | 10-14    | 1.90 (1.47-2.44) | <.0001  | 1.94 (1.51-2.50)           | <.0001  |
|                              | Age at diagnosis                                       | >=15     | 2.98 (2.34-3.78) | <.0001  | 3.03 (2.38-3.85)           | <.0001  |
|                              | YRI                                                    |          | 1.11 (0.50-2.46) | 0.80    | 1.12 (0.51-2.50)           | 0.78    |
|                              | ASA                                                    |          | 0.41 (0.11-1.50) | 0.18    | 0.41 (0.11-1.50)           | 0.18    |
|                              | Sex                                                    | Male     | 0.98 (0.82-1.17) | 0.85    | 0.99 (0.83-1.18)           | 0.89    |
|                              | Cranial /Abdomen /Pelvis /Chest /Neck RT               | Yes      | 2.51 (2.01-3.15) | <.0001  | 2.56 (2.04-3.21)           | <.0001  |
|                              | Alkylating agents /Anthracyclines /Epipodophyllotoxins | Yes      | 0.94 (0.78-1.12) | 0.46    | 0.94 (0.79-1.13)           | 0.51    |
|                              | CPV carriers                                           | Yes      |                  |         | 2.15 (1.52-3.05)           | <.0001  |
| <b>SMN-related mortality</b> | Age at diagnosis                                       | 5-9      | 1.26 (0.75-2.13) | 0.38    | 1.28 (0.76-2.15)           | 0.36    |
|                              | Age at diagnosis                                       | 10-14    | 2.74 (1.76-4.28) | <.0001  | 2.85 (1.82-4.45)           | <.0001  |
|                              | Age at diagnosis                                       | >=15     | 5.03 (3.31-7.67) | <.0001  | 5.18 (3.40-7.88)           | <.0001  |
|                              | YRI                                                    |          | 1.02 (0.27-3.96) | 0.97    | 1.04 (0.27-4.07)           | 0.95    |
|                              | ASA                                                    |          | 0.54 (0.18-1.68) | 0.29    | 0.53 (0.17-1.69)           | 0.29    |
|                              | Sex                                                    | Male     | 0.88 (0.66-1.18) | 0.40    | 0.89 (0.66-1.19)           | 0.43    |
|                              | Cranial /Abdomen /Pelvis /Chest /Neck RT               | Yes      | 2.90 (1.95-4.31) | <.0001  | 3.02 (2.03-4.49)           | <.0001  |
|                              | Alkylating agents /Anthracyclines /Epipodophyllotoxins | Yes      | 0.93 (0.69-1.25) | 0.63    | 0.94 (0.70-1.27)           | 0.70    |
|                              | CPV carriers                                           | Yes      |                  |         | 2.93 (1.73-4.99)           | <.0001  |
| <b>Other-cause mortality</b> | Age at diagnosis                                       | 5-9      | 1.14 (0.80-1.63) | 0.47    | 1.15 (0.81-1.63)           | 0.45    |
|                              | Age at diagnosis                                       | 10-14    | 1.55 (1.11-2.17) | 0.010   | 1.57 (1.12-2.20)           | 0.0085  |
|                              | Age at diagnosis                                       | >=15     | 2.05 (1.48-2.85) | <.0001  | 2.07 (1.49-2.87)           | <.0001  |
|                              | YRI                                                    |          | 1.15 (0.38-3.50) | 0.80    | 1.16 (0.38-3.54)           | 0.79    |
|                              | ASA                                                    |          | 0.47 (0.09-2.36) | 0.36    | 0.47 (0.09-2.38)           | 0.36    |
|                              | Sex                                                    | Male     | 1.13 (0.88-1.44) | 0.34    | 1.13 (0.89-1.44)           | 0.33    |
|                              | Cranial /Abdomen /Pelvis /Chest /Neck RT               | Yes      | 2.32 (1.72-3.13) | <.0001  | 2.34 (1.74-3.17)           | <.0001  |
|                              | Alkylating agents /Anthracyclines /Epipodophyllotoxins | Yes      | 0.92 (0.72-1.18) | 0.53    | 0.93 (0.73-1.19)           | 0.55    |
|                              | CPV carriers                                           | Yes      |                  |         | 1.60 (0.95-2.71)           | 0.077   |

Abbreviations: CCSS, the Childhood Cancer Survivor Study; CPV, Cancer Predisposition Variants; subHR, subdistribution Hazard Ratio; CI, Confidence Interval; YRI, Yoruba population (African ancestry) in 1000 Genome Project; ASA, Eastern Asian population (Japanese and Chinese) in 1000 Genomes Project; RT, radiotherapy; SMN, Subsequent Malignant Neoplasm.

**Supplementary Table 20. Subsequent malignant neoplasms (SMNs) diagnosed among survivors who were CPV carriers and died from SMNs.**

| <b>Childhood Cancer diagnosis</b> | <b>Cause of death (SMN types)</b>     | <b>CPG</b>     | <b>Cohort</b> |
|-----------------------------------|---------------------------------------|----------------|---------------|
| HL                                | Other connective and soft tissue      | SDHB           | SJLIFE        |
| WT                                | Kidney, except renal pelvis           | WT1            | SJLIFE        |
| RB                                | Other connective and soft tissue      | RB1            | SJLIFE        |
| RB                                | Bone and articular cartilage of limbs | RB1            | SJLIFE        |
| OS                                | Kidney, except renal pelvis           | FH             | SJLIFE        |
| ALL                               | Central Nervous System                | TMEM127        | SJLIFE        |
| STS                               | All Other Malignant Neoplasms         | NF1            | CCSS          |
| OS                                | Breast                                | TP53           | CCSS          |
| CNS                               | Central Nervous System                | NF1            | CCSS          |
| CNS                               | Central Nervous System                | NF1            | CCSS          |
| NHL                               | Prostate (male only)                  | CDKN2A         | CCSS          |
| NHL                               | All Other Malignant Neoplasms         | TP53           | CCSS          |
| OS                                | Large Intestine                       | TP53           | CCSS          |
| NHL                               | All Other Malignant Neoplasms         | PMS2           | CCSS          |
| STS                               | Central Nervous System                | TP53           | CCSS          |
| HL                                | Biliary Passages and Liver Primary    | PHOX2B         | CCSS          |
| STS                               | Breast                                | TP53           | CCSS          |
| CNS                               | Central Nervous System                | NF1,NF2        | CCSS          |
| HL                                | Stomach                               | BRCA2          | CCSS          |
| CNS                               | Biliary Passages and Liver Primary    | NF1            | CCSS          |
| CNS                               | Central Nervous System                | NF1,BRAF       | CCSS          |
| NBL                               | Central Nervous System                | NF1            | CCSS          |
| STS                               | Bronchus, Trachea, Lung               | TP53           | CCSS          |
| HL                                | All Other Malignant Neoplasms         | BRCA2          | CCSS          |
| WT                                | Central Nervous System                | NRAS           | CCSS          |
| NHL                               | Non-Hodgkin's Lymphoma                | NF1            | CCSS          |
| ALL                               | Central Nervous System                | PTPN11,SMARCA4 | CCSS          |
| HL                                | Biliary Passages and Liver Primary    | BRCA2          | CCSS          |

Abbreviations: CPG, Cancer Predisposition Genes; SJLIFE, the St. Jude Lifetime Cohort Study; CCSS, the Childhood Cancer Survivor Study; ALL, Acute Lymphoblastic Leukemia; HL, Hodgkin Lymphoma; NHL, Non-Hodgkin Lymphoma; CNS, Central Nervous System; WT, Wilms Tumor; NBL, Neuroblastoma; RB, Retinoblastoma; OS, Osteosarcoma; STS, Soft Tissue Sarcoma.

**Supplementary Table 21. Fixed effects meta-analysis of treatment stratified models.**

| <b>Category</b>                   | <b>OR</b> | <b>95% CI</b> | <b>P-value</b> | <b>P<sub>het</sub></b> | <b>I<sup>2</sup></b> |
|-----------------------------------|-----------|---------------|----------------|------------------------|----------------------|
| Chest-RT < 20 Gy*                 | 3.67      | (2.23-6.05)   | <.0001         |                        |                      |
| Chest-RT ≥ 20 Gy                  | 1.52      | (0.45-5.10)   | 0.50           |                        |                      |
| Combined                          | 3.20      | (2.01-5.11)   | <.0001         | 0.17                   | 47.1                 |
| Alkylating agents 2nd/3rd tertile | 3.85      | (1.94-7.63)   | 0.00011        |                        |                      |
| Alkylating agents 0/1st tertile   | 2.83      | (1.50-5.34)   | 0.0014         |                        |                      |
| Combined                          | 3.26      | (2.04-5.22)   | <.0001         | 0.49                   | 0                    |

Abbreviations: OR, Odds Ratio; CI, Confidence Interval; P<sub>het</sub>, heterogeneity p value based on Cochran's Q statistic; RT, radiotherapy; \*Including no chest-RT.
